# Supplementary material for: Microbiota Associated with Different Developmental Stages of the Dry Rot Fungus Serpula lacrymans
Source: MDPI journal article supplement (doi:10.3390/jof7050354), 2021-04-30
Supplement: s1 [file s1]

## **Supplementary materials**

### **Microbiota associated with different developmental stages of the dry rot fungus**

#### ***Serpula lacrymans***

Julia Embacher<sup>1</sup>, Sigrid Neuhauser<sup>1</sup>, Susanne Zeilinger<sup>1</sup>, and Martin Kirchmair<sup>1\*</sup>

<sup>1</sup>Department of Microbiology, University of Innsbruck, Technikerstrasse 25, 6020 Innsbruck, Austria

\*Correspondence: martin.kirchmair@uibk.ac.at

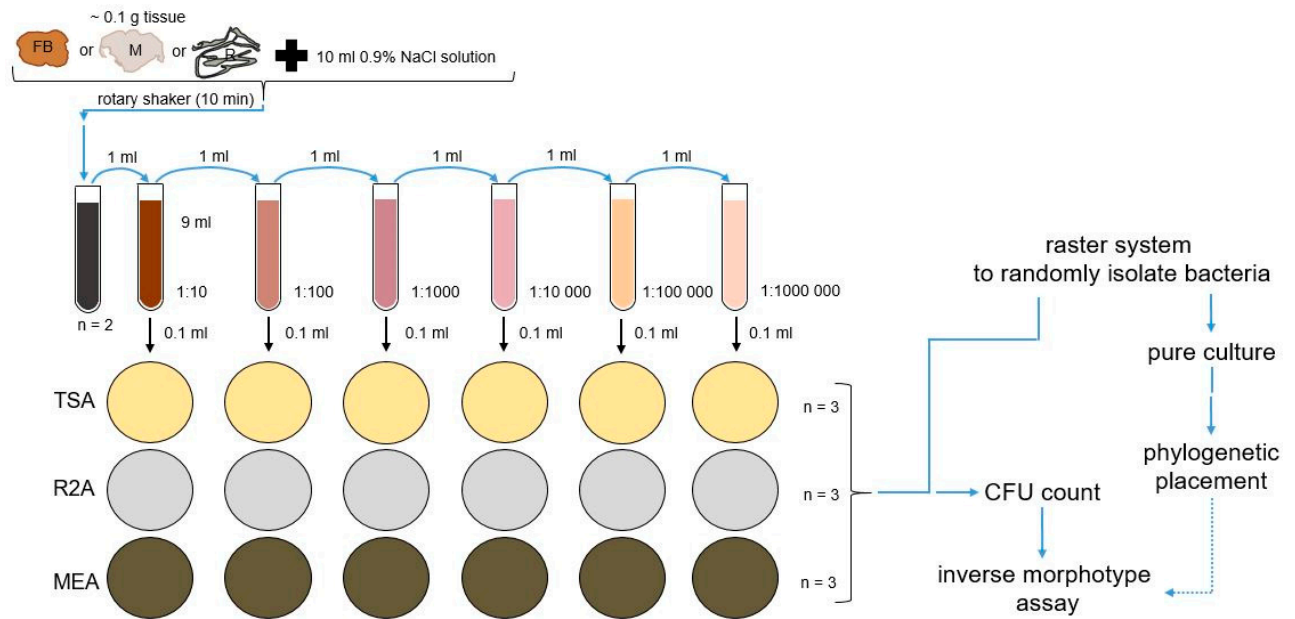

**Figure S1 | Isolation and characterization of bacteria from tissues of *Serpula lacrymans***  
– including 16S rRNA gene fingerprint and inverse morphotype assay: 0.1 - 1 g fungal tissue (FB: fruiting body, M: mycelia, R: rhizomorphs) were homogenized in 10 ml 0.9% NaCl solution. 100 µL of this suspension (or of a serial dilution therefrom) were plated on tryptone soy agar (TSA), R2A agar, and malt extract agar (MEA) in triplicates and incubated for 7 days at 25 °C. Petri dishes were checked daily. Petri dishes with 30 to 100 CFU were used for counting. Bacterial colonies were divided into morphotypes and the CFU of each morphotype were counted. From each plate 6 CFU were selected randomly (raster system) and bacterial pure cultures were created and identified upon their 16S rRNA gene. Each morphotype could therefore be assigned to 16S rRNA gene sequences.

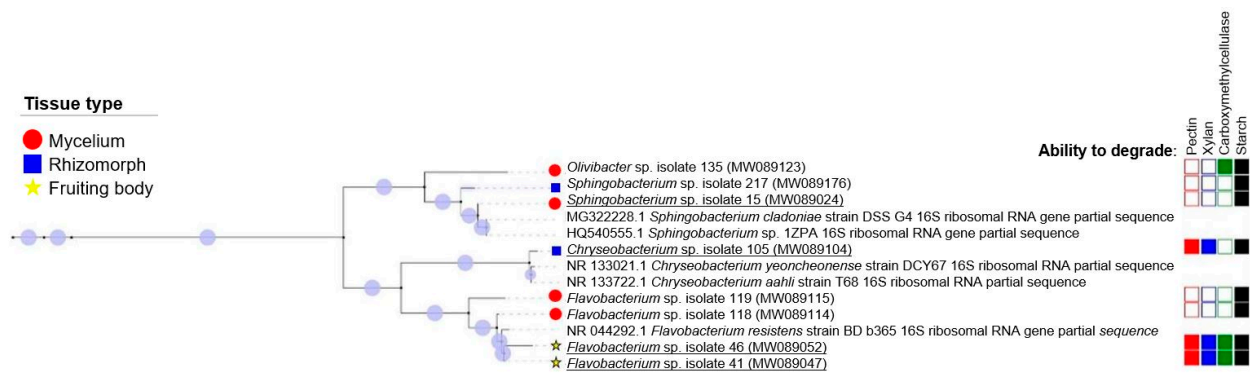

**Figure S2 | Cladogram of bacteria belonging to the phylum Bacteroidetes (PHYML).** 16S rRNA gene sequences show the relationships between bacteria isolated from *S. lacrymans* tissue types. Most 16S rRNA gene sequences had high similarity with type species (>98%-100%); final assignment at genera level was based on the best blast result. 13 sequences were used for tree creation. Light blue circles indicate a  $\chi^2$  statistics greater than 0.75. Reference sequences were retrieved from NCBI. Symbols that indicate tissue of isolation: red circle = bacteria isolated from mycelium; star = bacteria isolated from fruiting body and blue rectangle = bacteria isolated from rhizomorphs. Symbols on the right: red rectangle indicates ability to degrade pectin, blue rectangle indicates ability to degrade xylan, green rectangle indicates ability to degrade carboxymethylcellulose and black rectangle indicates ability to degrade starch. Underlined isolates were tested in co-culture assays.

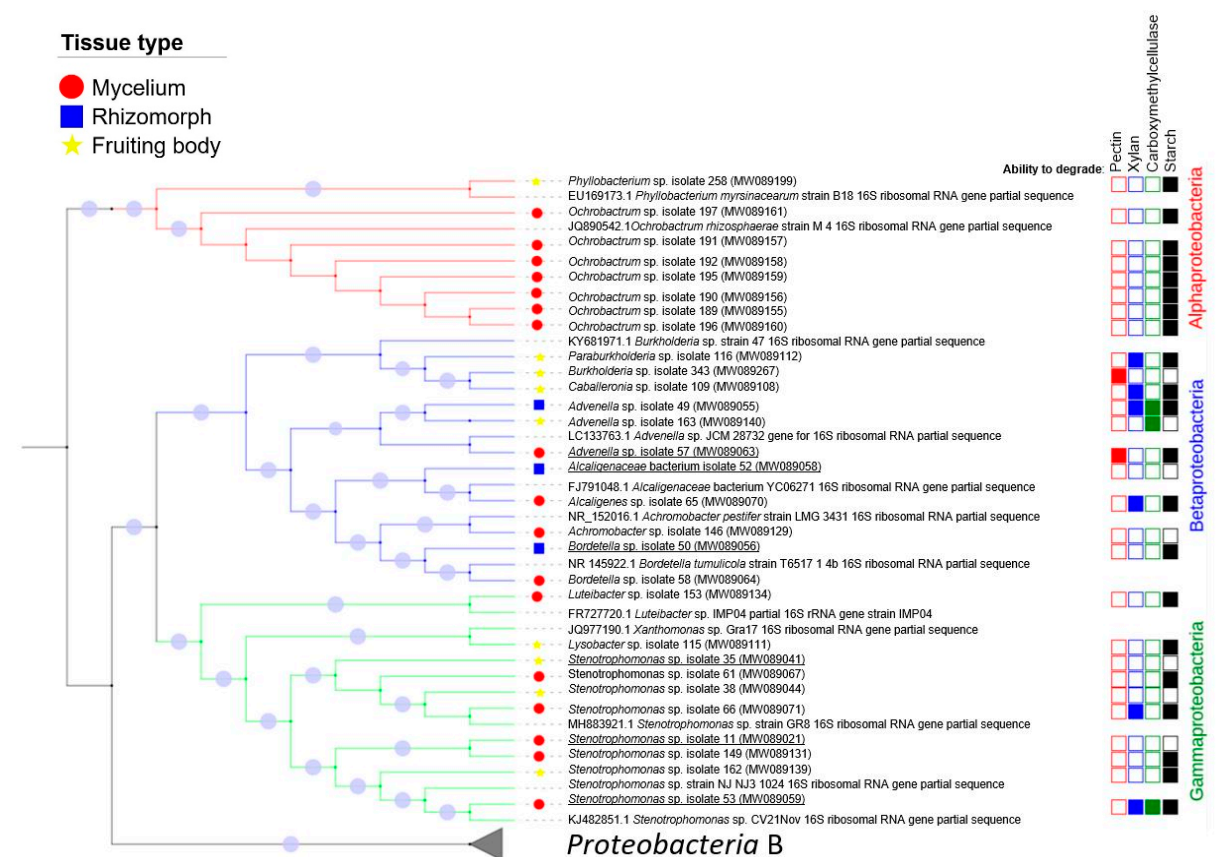

**Figure S3 | Cladogram of bacteria belonging to the phylum Proteobacteria (part A) (PHYML).** 16S rRNA gene sequences show the relationships between bacteria isolated from *S. lacrymans* tissue types. Most 16S rRNA gene sequences had high similarity with type species (>98%-100%); final assignment at genera level was based on the best blast result. 41 sequences were used for tree creation. Light blue circles indicate a  $\chi^2$  statistics greater than 0.75. Reference sequences were retrieved from NCBI. Symbols that indicate tissue of isolation: red circle = bacteria isolated from mycelium; star = bacteria isolated from fruiting body and blue rectangle = bacteria isolated from rhizomorphs. Symbols on the right: red rectangle indicates ability to degrade pectin, blue rectangle indicates ability to degrade xylan, green rectangle indicates ability to degrade carboxymethylcellulose and black rectangle indicates ability to degrade starch. Red branches are Alphaproteobacteria, blue branches are Betaproteobacteria and green branches are Gammaproteobacteria. For *Proteobacteria* part B see figure S4. Underlined isolates were tested in co-culture assays

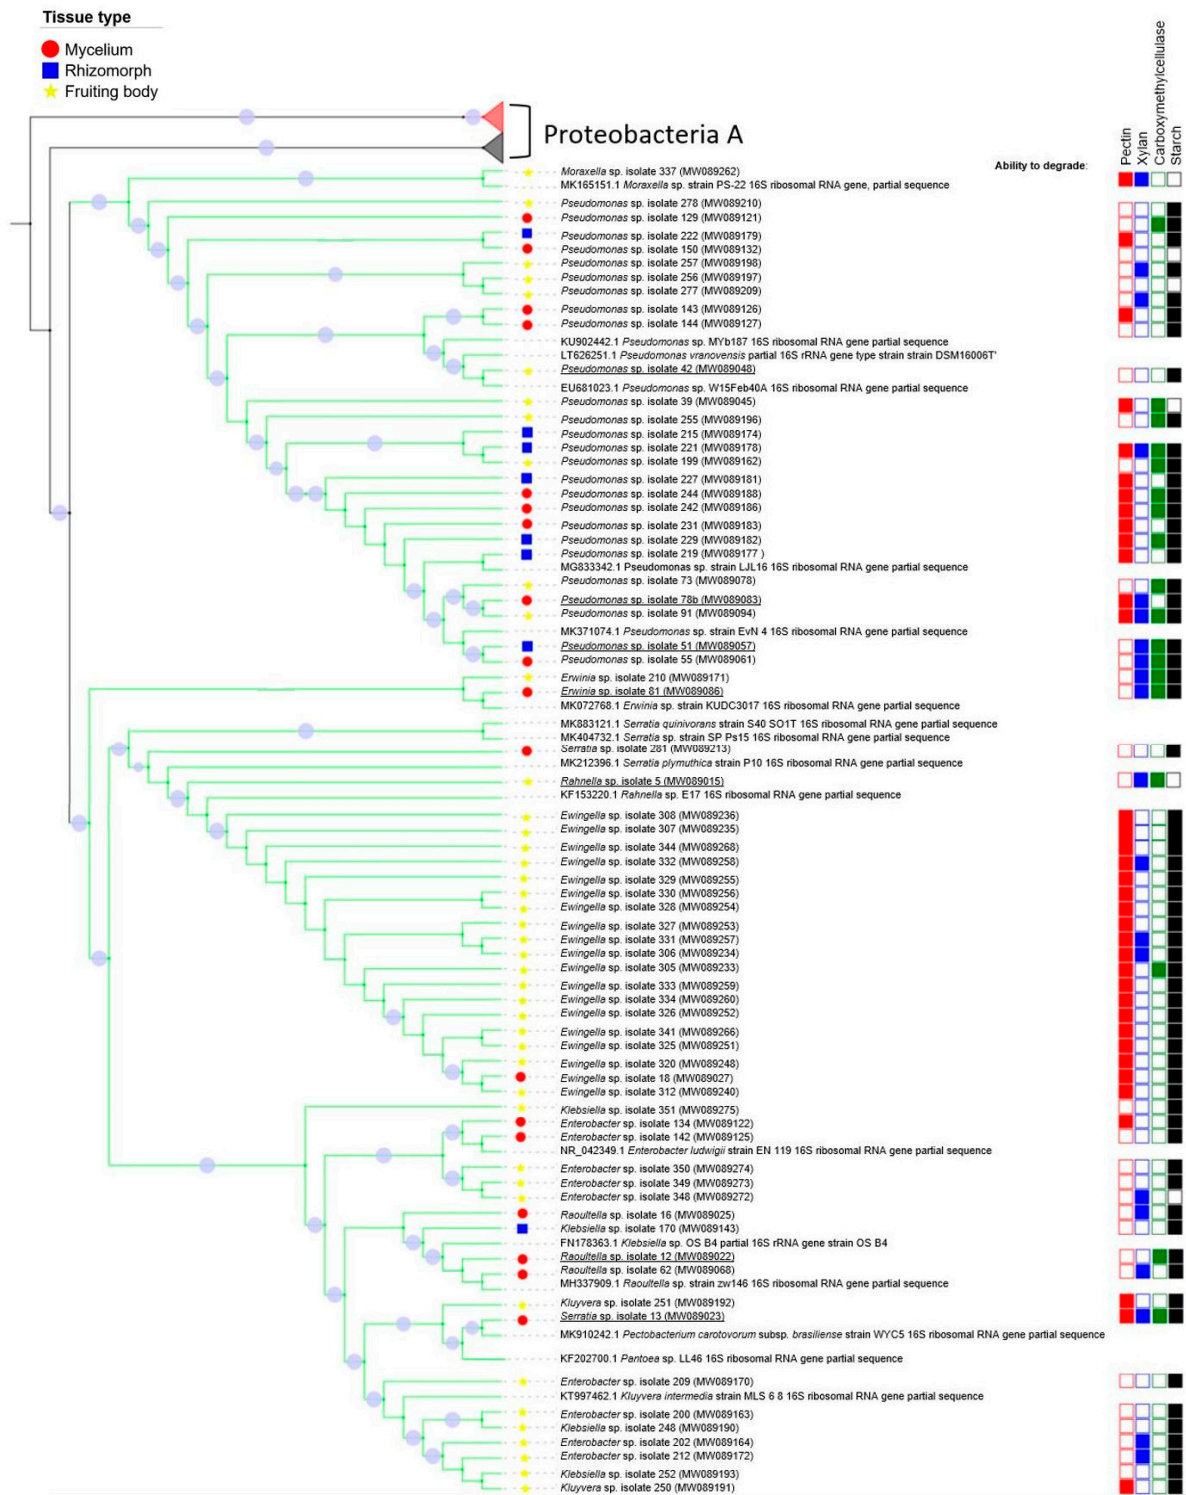

**Figure S4 | Cladogram of bacteria belonging to the phylum Proteobacteria (part B) (PHYML).** 16S rRNA gene sequences show the relationships between bacteria isolated from *S. lacrymans* tissue types. Most 16S rRNA gene sequences had high similarity with type species (>98%-100%); final assignment at genera level was based on the best blast result. 138 sequences were used for tree creation. Light blue circles indicate a  $\chi^2$  statistics greater than 0.75. Reference sequences were retrieved from NCBI. Symbols that indicate tissue of isolation: red circle = bacteria isolated from mycelium; star = bacteria isolated from fruiting body and blue rectangle = bacteria isolated from rhizomorphs. Symbols on the right: red rectangle indicates ability to degrade pectin, blue rectangle indicates ability to degrade xylan, green rectangle indicates ability to degrade carboxymethylcellulose and black rectangle indicates ability to degrade starch. Green branches show Gammaproteobacteria. For Proteobacteria part A see figure S3. Underlined isolates were tested in co-culture assays.



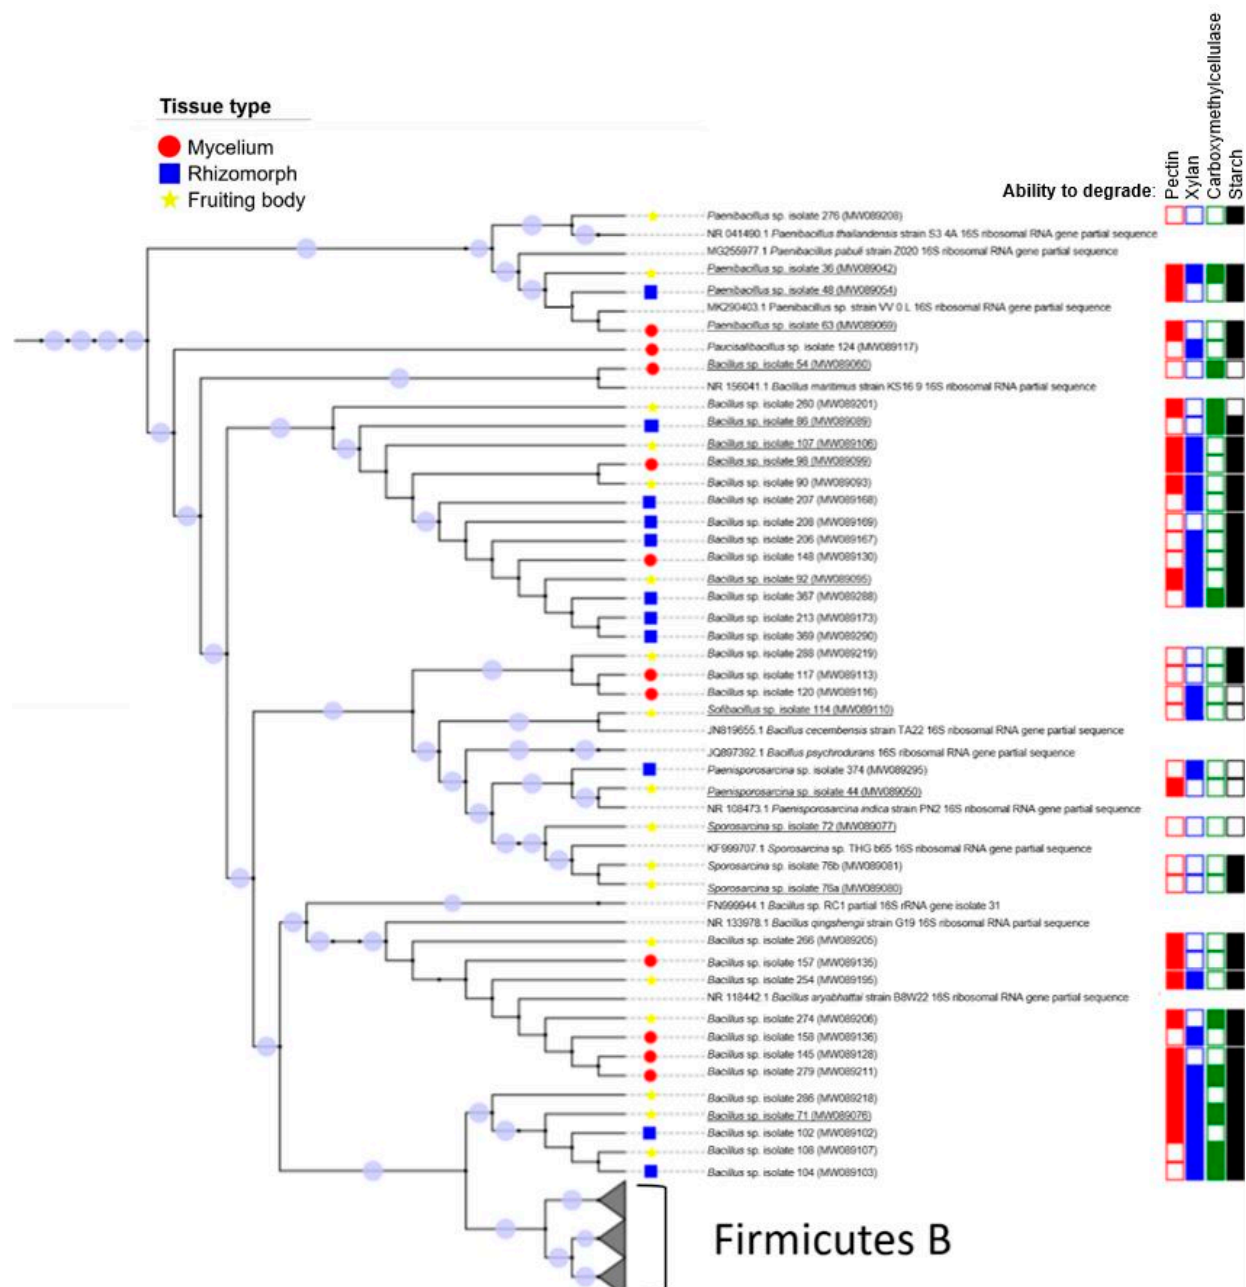

**Figure S5 | Cladogram of bacteria belonging to the phylum Firmicutes (part A) (PHYML).**

16S rRNA gene sequences show the relationships between bacteria isolated from *S. lacrymans* tissue types. Most 16S rRNA gene sequences had high similarity with type species (>98%-100%); final assignment at genera level was based on the best blast result. 102 sequences were used for tree creation. Light blue circles indicate a  $\chi^2$  statistics greater than 0.75. Reference sequences were retrieved from NCBI. Symbols that indicate tissue of isolation: red circle = bacteria isolated from mycelium; star = bacteria isolated from fruiting body and blue rectangle = bacteria isolated from rhizomorphs. Symbols on the right: red

rectangle indicates ability to degrade pectin, blue rectangle indicates ability to degrade xylan, green rectangle indicates ability to degrade carboxymethylcellulose and black rectangle indicates ability to degrade starch. For Firmicutes part B see figure S6. Underlined isolates were tested in co-culture assays.

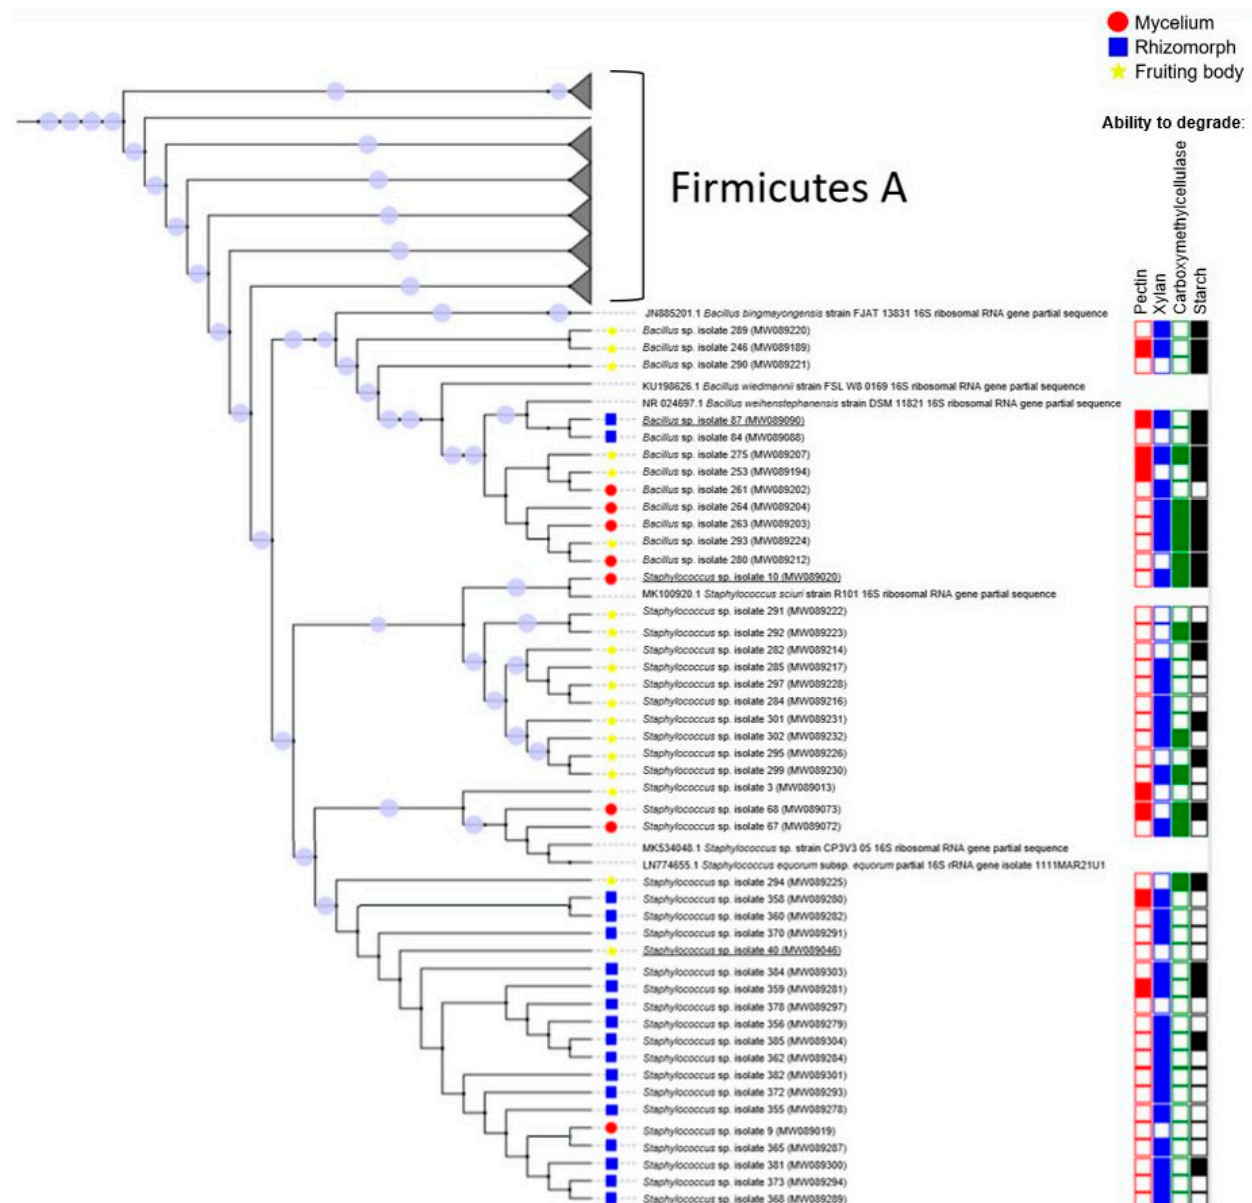

**Figure S6 | Cladogram of bacteria belonging to the phylum Firmicutes (part B) (PHYML).**

16S rRNA gene sequences show the relationships between bacteria isolated from *S. lacrymans* tissue types. Most 16S rRNA gene sequences had high similarity with type species (>98%-100%); final assignment at genera level was based on the best blast result. 102 sequences were used for tree creation. Light blue circles indicate a  $\chi^2$  statistics greater than



0.75. Reference sequences were retrieved from NCBI. Symbols that indicate tissue of isolation: red circle = bacteria isolated from mycelium; star = bacteria isolated from fruiting body and blue rectangle = bacteria isolated from rhizomorphs. Symbols on the right: red rectangle indicates ability to degrade pectin, blue rectangle indicates ability to degrade xylan, green rectangle indicates ability to degrade carboxymethylcellulose and black rectangle indicates ability to degrade starch. For Firmicutes part A see figure S5. Underlined isolates were tested in co-culture assays.

## Tissue type

- Mycelium
- Rhizomorph
- ★ Fruiting body

## Ability to degrade:

- Pectin
- Xylan
- Carboxymethylcellulase
- Starch

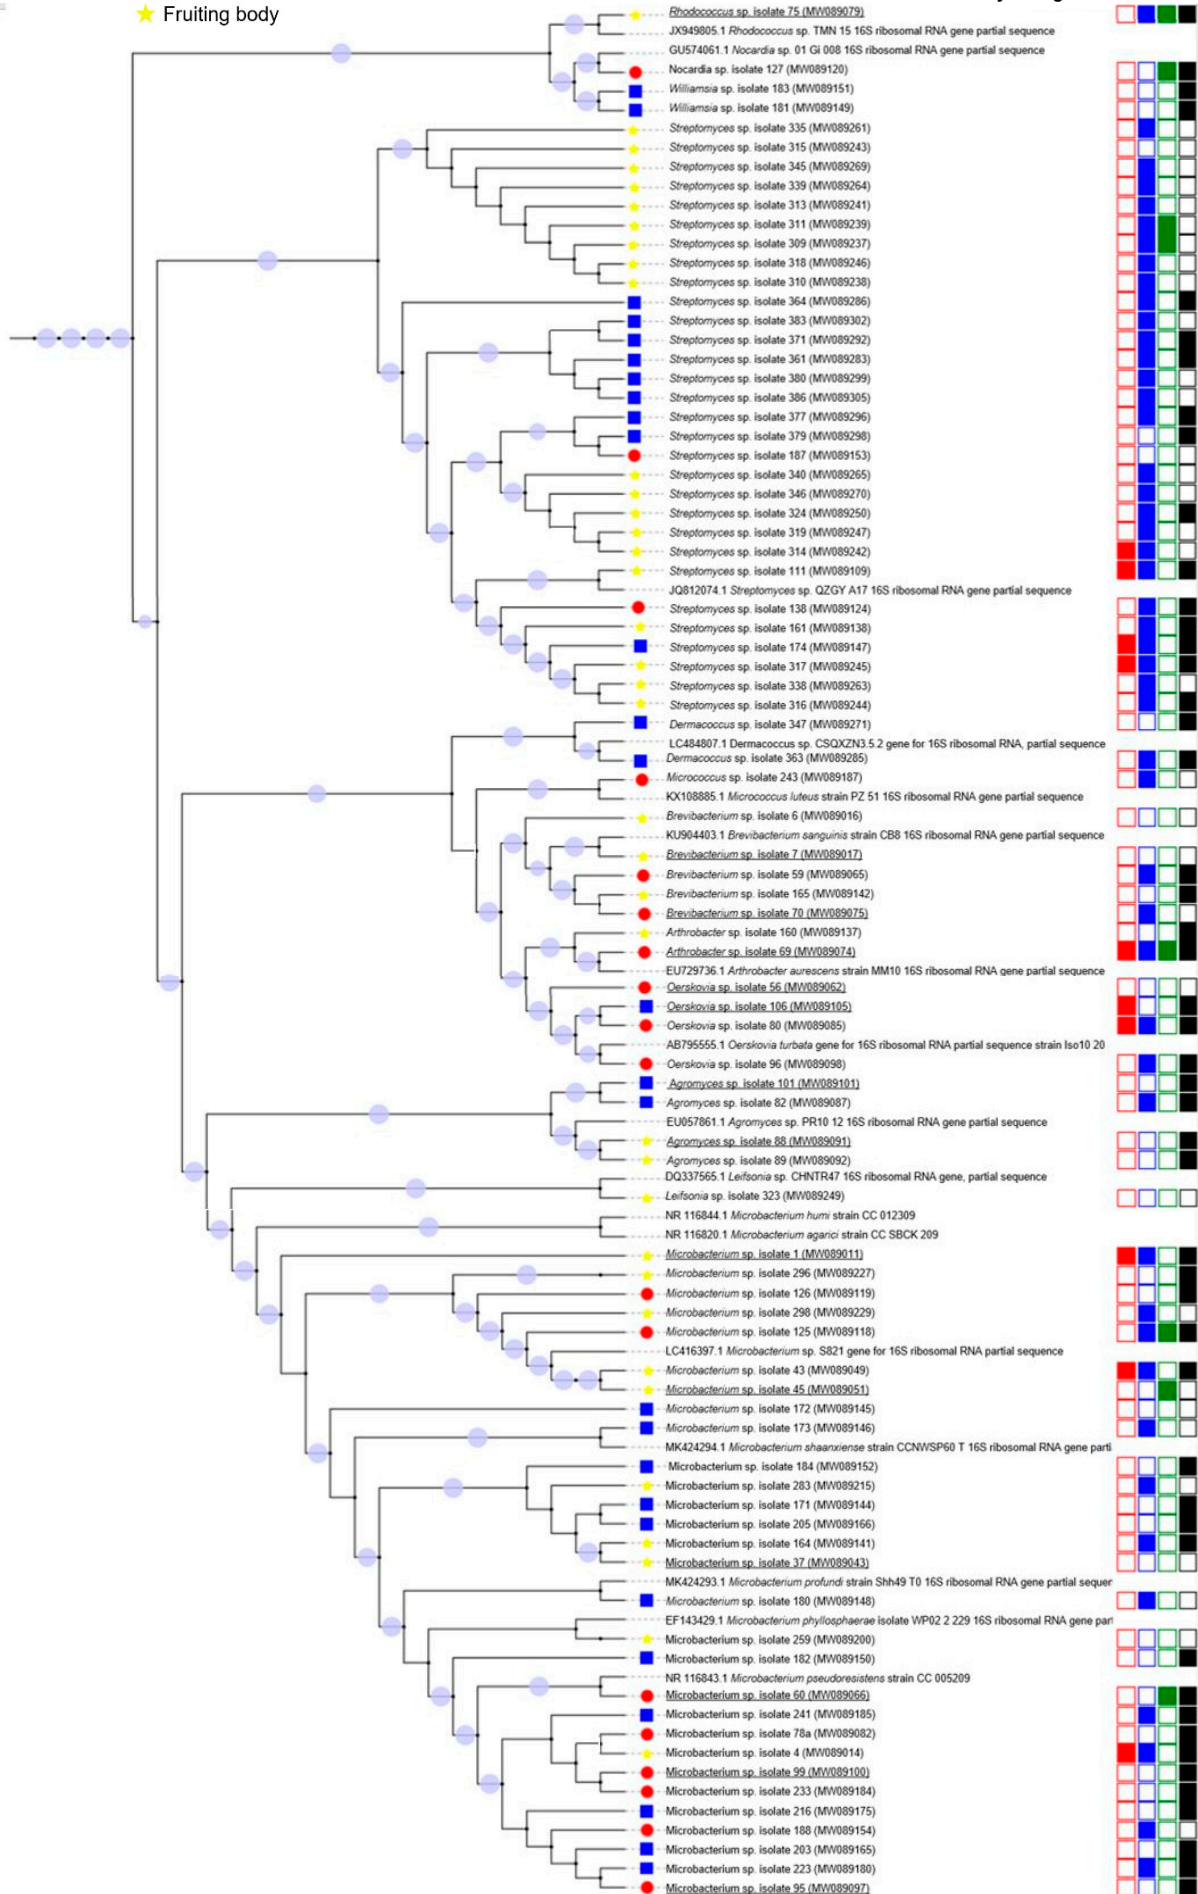

**Figure S7 | Cladogram of bacteria belonging to the phylum Actinobacteria (PHYML).**

16S rRNA gene sequences show the relationships between bacteria isolated from *S. lacrymans* tissue types. Most 16S rRNA gene sequences had high similarity with type species (>98%-100%); final assignment at genera level was based on the best blast result and the phylogenetic tree. 99 sequences were used for tree creation. Light blue circles indicate a  $\chi^2$  statistics greater than 0.75. Reference sequences were retrieved from NCBI. Symbols that indicate tissue of isolation: red circle = bacteria isolated from mycelium; star = bacteria isolated from fruiting body and blue rectangle = bacteria isolated from rhizomorphs. Symbols on the right: red rectangle indicates ability to degrade pectin, blue rectangle indicates ability to degrade xylan, green rectangle indicates ability to degrade carboxymethylcellulose and black rectangle indicates ability to degrade starch. Underlined isolates were tested in co-culture assays.

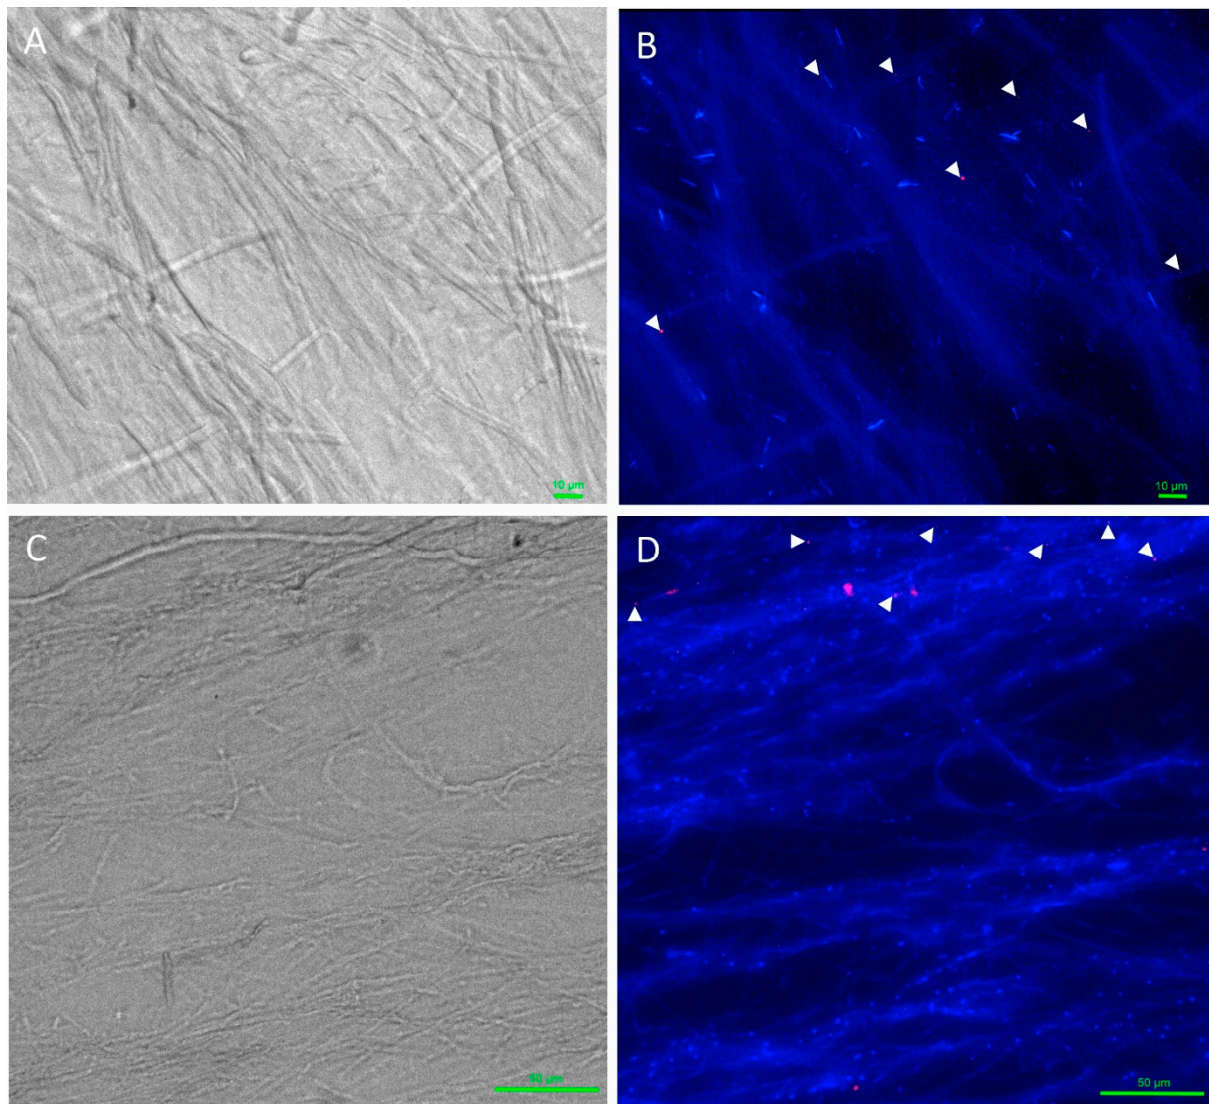

**Figure S8 | Localization of bacteria on *S. lacrymans* rhizomorphs and mycelium. A** Overlay of signals derived from EUB338 Mix-Cy5 and DAPI. Investigated tissue type = rhizomorph. **B** Transmitted light picture of rhizomorph. **C** Overlay of signals derived from EUB338 Mix-Cy5 and DAPI. Investigated tissue type = mycelium. **D** Transmitted light picture of fungal mycelium. The general bacterial EUB338 Mix probe gave red signals. Signals are highlighted with white arrows. Scale bars are 10 and 50  $\mu\text{m}$ .

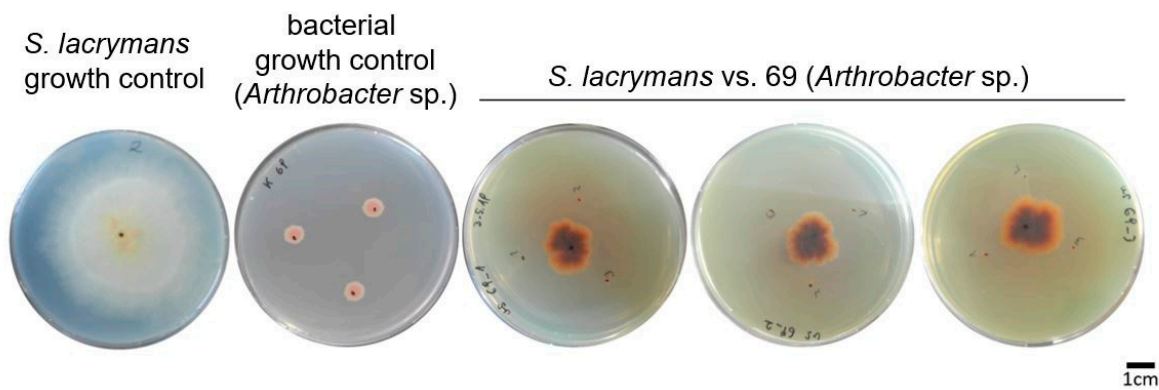

**Figure S9 | Inhibition of bacterial growth by *S. lacrymans*.** Growth impairment of bacterial isolate 69 (*Arthrobacter* sp.) during co-cultivation with *S. lacrymans*. Pictures were taken after cultivation for 31 days on minimal media at 25 °C.

**Table S1: Accession numbers for sequences of bacterial isolates retrieved from NCBI:**

Bacteria isolated from *Serpula lacrymans* or *Coniophora puteana* (CP) tissue (FB = Fruiting body, M = Mycelia, R = Rhizomorph) on either Tryptone Soy agar (TSA), R2A or Malt extract agar (MEA); + means sequences are included in the cladograms or – no consideration in the phylogenetic analysis.

| Accession No. | Isolate No. | Species                     | isolation |       | included in Cladogram |
|---------------|-------------|-----------------------------|-----------|-------|-----------------------|
|               |             |                             | tissue    | media |                       |
| MW089011      | 1           | <i>Microbacterium</i> sp.   | FB        | TSA   | +                     |
| MW089012      | 2           | <i>Microbacterium</i> sp.   | FB        | TSA   | -                     |
| MW089013      | 3           | <i>Staphylococcus</i> sp.   | FB        | TSA   | +                     |
| MW089014      | 4           | <i>Microbacterium</i> sp.   | FB        | TSA   | +                     |
| MW089015      | 5           | <i>Rahnella</i> sp.         | FB        | TSA   | +                     |
| MW089016      | 6           | <i>Brevibacterium</i> sp.   | FB        | TSA   | +                     |
| MW089017      | 7           | <i>Brevibacterium</i> sp.   | FB        | TSA   | +                     |
| MW089018      | 8           | <i>Microbacterium</i> sp.   | M         | TSA   | -                     |
| MW089019      | 9           | <i>Staphylococcus</i> sp.   | M         | TSA   | +                     |
| MW089020      | 10          | <i>Staphylococcus</i> sp.   | M         | TSA   | +                     |
| MW089021      | 11          | <i>Stenotrophomonas</i> sp. | M         | TSA   | +                     |
| MW089022      | 12          | <i>Raoultella</i> sp.       | M         | TSA   | +                     |
| MW089023      | 13          | <i>Serratia</i> sp.         | M         | TSA   | +                     |
| MW089024      | 15          | <i>Sphingobacterium</i> sp. | M         | TSA   | +                     |
| MW089025      | 16          | <i>Raoultella</i> sp.       | M         | TSA   | +                     |
| MW089026      | 17          | <i>Okibacterium</i> sp.     | M         | TSA   | -                     |
| MW089027      | 18          | <i>Ewingella</i> sp.        | M         | TSA   | +                     |
| MW089028      | 20          | <i>Microbacterium</i> sp.   | FB CP     | TSA   | -                     |
| MW089029      | 21          | <i>Pseudomonas</i> sp.      | FB CP     | TSA   | -                     |
| MW089030      | 22          | <i>Microbacterium</i> sp.   | FB CP     | TSA   | -                     |
| MW089031      | 23          | <i>Microbacterium</i> sp.   | FB CP     | TSA   | -                     |
| MW089032      | 24          | <i>Microbacterium</i> sp.   | FB CP     | TSA   | -                     |
| MW089033      | 26          | <i>Paenibacillus</i> sp.    | M CP      | TSA   | -                     |
| MW089034      | 27          | <i>Bacillus</i> sp.         | M CP      | TSA   | -                     |
| MW089035      | 28          | <i>Advenella</i> sp.        | M CP      | TSA   | -                     |
| MW089036      | 29          | <i>Pseudomonas</i> sp.      | M CP      | TSA   | -                     |
| MW089037      | 30          | <i>Bacillus</i> sp.         | M CP      | TSA   | -                     |
| MW089038      | 31          | <i>Staphylococcus</i> sp.   | M CP      | TSA   | -                     |
| MW089039      | 33          | <i>Sporosarcina</i> sp.     | M CP      | TSA   | -                     |
| MW089040      | 34          | <i>Bacillus</i> sp.         | M CP      | TSA   | -                     |
| MW089041      | 35          | <i>Stenotrophomonas</i> sp. | FB        | TSA   | +                     |
| MW089042      | 36          | <i>Paenibacillus</i> sp.    | FB        | TSA   | +                     |
| MW089043      | 37          | <i>Microbacterium</i> sp.   | FB        | TSA   | +                     |
| MW089044      | 38          | <i>Stenotrophomonas</i> sp. | FB        | TSA   | +                     |



|          |     |                                           |    |     |   |
|----------|-----|-------------------------------------------|----|-----|---|
| MW089045 | 39  | <i>Pseudomonas</i> sp.                    | FB | TSA | + |
| MW089046 | 40  | <i>Staphylococcus</i> sp.                 | FB | TSA | + |
| MW089047 | 41  | <i>Flavobacterium</i> sp.                 | FB | TSA | + |
| MW089048 | 42  | <i>Pseudomonas</i> sp.                    | FB | TSA | + |
| MW089049 | 43  | <i>Microbacterium</i> sp.                 | FB | TSA | + |
| MW089050 | 44  | <i>Paenispodosarcina</i> sp.              | FB | TSA | + |
| MW089051 | 45  | <i>Microbacterium</i> sp.                 | FB | TSA | + |
| MW089052 | 46  | <i>Flavobacterium</i> sp.                 | FB | TSA | + |
| MW089053 | 47  | <i>Bacillus</i> sp.                       | R  | TSA | - |
| MW089054 | 48  | <i>Paenibacillus</i> sp.                  | R  | TSA | + |
| MW089055 | 49  | <i>Advenella</i> sp.                      | R  | TSA | + |
| MW089056 | 50  | <i>Bordetella</i> sp.                     | R  | TSA | + |
| MW089057 | 51  | <i>Pseudomonas</i> sp.                    | R  | TSA | + |
| MW089058 | 52  | <i>Alcaligenaceae</i><br><i>bacterium</i> | R  | TSA | + |
| MW089059 | 53  | <i>Stenotrophomonas</i> sp.               | M  | TSA | + |
| MW089060 | 54  | <i>Bacillus</i> sp.                       | M  | TSA | + |
| MW089061 | 55  | <i>Pseudomonas</i> sp.                    | M  | TSA | + |
| MW089062 | 56  | <i>Oerskovia</i> sp.                      | M  | TSA | + |
| MW089063 | 57  | <i>Advenella</i> sp.                      | M  | TSA | + |
| MW089064 | 58  | <i>Bordetella</i> sp.                     | M  | TSA | + |
| MW089065 | 59  | <i>Brevibacterium</i> sp.                 | M  | TSA | + |
| MW089066 | 60  | <i>Microbacterium</i> sp.                 | M  | TSA | + |
| MW089067 | 61  | <i>Stenotrophomonas</i> sp.               | M  | TSA | + |
| MW089068 | 62  | <i>Raoultella</i> sp.                     | M  | TSA | + |
| MW089069 | 63  | <i>Paenibacillus</i> sp.                  | M  | TSA | + |
| MW089070 | 65  | <i>Alcaligenes</i> sp.                    | M  | TSA | + |
| MW089071 | 66  | <i>Stenotrophomonas</i> sp.               | M  | TSA | + |
| MW089072 | 67  | <i>Staphylococcus</i> sp.                 | M  | TSA | + |
| MW089073 | 68  | <i>Staphylococcus</i> sp.                 | M  | TSA | + |
| MW089074 | 69  | <i>Arthrobacter</i> sp.                   | M  | TSA | + |
| MW089075 | 70  | <i>Brevibacterium</i> sp.                 | M  | TSA | + |
| MW089076 | 71  | <i>Bacillus</i> sp.                       | FB | TSA | + |
| MW089077 | 72  | <i>Sporosarcina</i> sp.                   | FB | TSA | + |
| MW089078 | 73  | <i>Pseudomonas</i> sp.                    | FB | TSA | + |
| MW089079 | 75  | <i>Rhodococcus</i> sp.                    | FB | TSA | + |
| MW089080 | 76a | <i>Sporosarcina</i> sp.                   | FB | TSA | + |
| MW089081 | 76b | <i>Sporosarcina</i> sp.                   | FB | TSA | + |
| MW089082 | 78a | <i>Microbacterium</i> sp.                 | M  | TSA | + |
| MW089083 | 78b | <i>Pseudomonas</i> sp.                    | M  | TSA | + |
| MW089084 | 79  | <i>Paenibacillus</i> sp.                  | M  | TSA | - |
| MW089085 | 80  | <i>Oerskovia</i> sp.                      | M  | TSA | + |
| MW089086 | 81  | <i>Erwinia</i> sp.                        | M  | TSA | + |
| MW089087 | 82  | <i>Agromyces</i> sp.                      | R  | TSA | + |
| MW089088 | 84  | <i>Bacillus</i> sp.                       | R  | TSA | + |

|          |     |                              |    |     |   |
|----------|-----|------------------------------|----|-----|---|
| MW089089 | 86  | <i>Bacillus</i> sp.          | R  | TSA | + |
| MW089090 | 87  | <i>Bacillus</i> sp.          | R  | TSA | + |
| MW089091 | 88  | <i>Agromyces</i> sp.         | FB | TSA | + |
| MW089092 | 89  | <i>Agromyces</i> sp.         | FB | TSA | + |
| MW089093 | 90  | <i>Bacillus</i> sp.          | FB | TSA | + |
| MW089094 | 91  | <i>Pseudomonas</i> sp.       | FB | R2A | + |
| MW089095 | 92  | <i>Bacillus</i> sp.          | FB | R2A | + |
| MW089096 | 93  | <i>Streptomyces</i> sp.      | FB | R2A | - |
| MW089097 | 95  | <i>Microbacterium</i> sp.    | M  | R2A | + |
| MW089098 | 96  | <i>Oerskovia</i> sp.         | M  | R2A | + |
| MW089099 | 98  | <i>Bacillus</i> sp.          | M  | R2A | + |
| MW089100 | 99  | <i>Microbacterium</i> sp.    | M  | R2A | + |
| MW089101 | 101 | <i>Agromyces</i> sp.         | R  | R2A | + |
| MW089102 | 102 | <i>Bacillus</i> sp.          | R  | R2A | + |
| MW089103 | 104 | <i>Bacillus</i> sp.          | R  | R2A | + |
| MW089104 | 105 | <i>Chryseobacterium</i> sp.  | R  | R2A | + |
| MW089105 | 106 | <i>Oerskovia</i> sp.         | R  | R2A | + |
| MW089106 | 107 | <i>Bacillus</i> sp.          | FB | R2A | + |
| MW089107 | 108 | <i>Bacillus</i> sp.          | FB | R2A | + |
| MW089108 | 109 | <i>Caballeronia</i> sp.      | FB | R2A | + |
| MW089109 | 111 | <i>Streptomyces</i> sp.      | FB | R2A | + |
| MW089110 | 114 | <i>Solibacillus</i> sp.      | FB | TSA | + |
| MW089111 | 115 | <i>Lysobacter</i> sp.        | FB | TSA | + |
| MW089112 | 116 | <i>Paraburkholderia</i> sp.  | FB | R2A | + |
| MW089113 | 117 | <i>Bacillus</i> sp.          | M  | TSA | + |
| MW089114 | 118 | <i>Flavobacterium</i> sp.    | M  | TSA | + |
| MW089115 | 119 | <i>Flavobacterium</i> sp.    | M  | TSA | + |
| MW089116 | 120 | <i>Bacillus</i> sp.          | M  | TSA | + |
| MW089117 | 124 | <i>Paucisalibacillus</i> sp. | M  | TSA | + |
| MW089118 | 125 | <i>Microbacterium</i> sp.    | M  | TSA | + |
| MW089119 | 126 | <i>Microbacterium</i> sp.    | M  | TSA | + |
| MW089120 | 127 | <i>Nocardia</i> sp.          | M  | TSA | + |
| MW089121 | 129 | <i>Pseudomonas</i> sp.       | M  | MEA | + |
| MW089122 | 134 | <i>Enterobacter</i> sp.      | M  | TSA | + |
| MW089123 | 135 | <i>Olivibacter</i> sp.       | M  | TSA | + |
| MW089124 | 138 | <i>Streptomyces</i> sp.      | M  | TSA | + |
| MW089125 | 142 | <i>Enterobacter</i> sp.      | M  | MEA | + |
| MW089126 | 143 | <i>Pseudomonas</i> sp.       | M  | TSA | + |
| MW089127 | 144 | <i>Pseudomonas</i> sp.       | M  | TSA | + |
| MW089128 | 145 | <i>Bacillus</i> sp.          | M  | TSA | + |
| MW089129 | 146 | <i>Achromobacter</i> sp.     | M  | TSA | + |
| MW089130 | 148 | <i>Bacillus</i> sp.          | M  | TSA | + |
| MW089131 | 149 | <i>Stenotrophomonas</i> sp.  | M  | TSA | + |
| MW089132 | 150 | <i>Pseudomonas</i> sp.       | M  | TSA | + |
| MW089133 | 152 | <i>Pseudomonas</i> sp.       | M  | R2A | - |

|          |     |                             |    |     |   |
|----------|-----|-----------------------------|----|-----|---|
| MW089134 | 153 | <i>Luteibacter</i> sp.      | M  | R2A | + |
| MW089135 | 157 | <i>Bacillus</i> sp.         | M  | MEA | + |
| MW089136 | 158 | <i>Bacillus</i> sp.         | M  | MEA | + |
| MW089137 | 160 | <i>Arthrobacter</i> sp.     | FB | TSA | + |
| MW089138 | 161 | <i>Streptomyces</i> sp.     | FB | TSA | + |
| MW089139 | 162 | <i>Stenotrophomonas</i> sp. | FB | TSA | + |
| MW089140 | 163 | <i>Advenella</i> sp.        | FB | TSA | + |
| MW089141 | 164 | <i>Microbacterium</i> sp.   | FB | TSA | + |
| MW089142 | 165 | <i>Brevibacterium</i> sp.   | FB | TSA | + |
| MW089143 | 170 | <i>Klebsiella</i> sp.       | R  | TSA | + |
| MW089144 | 171 | <i>Microbacterium</i> sp.   | R  | TSA | + |
| MW089145 | 172 | <i>Microbacterium</i> sp.   | R  | TSA | + |
| MW089146 | 173 | <i>Microbacterium</i> sp.   | R  | TSA | + |
| MW089147 | 174 | <i>Streptomyces</i> sp.     | R  | TSA | + |
| MW089148 | 180 | <i>Microbacterium</i> sp.   | R  | R2A | + |
| MW089149 | 181 | <i>Williamsia</i> sp.       | R  | R2A | + |
| MW089150 | 182 | <i>Microbacterium</i> sp.   | R  | R2A | + |
| MW089151 | 183 | <i>Williamsia</i> sp.       | R  | R2A | + |
| MW089152 | 184 | <i>Microbacterium</i> sp.   | M  | R2A | + |
| MW089153 | 187 | <i>Streptomyces</i> sp.     | M  | R2A | + |
| MW089154 | 188 | <i>Microbacterium</i> sp.   | M  | TSA | + |
| MW089155 | 189 | <i>Ochrobactrum</i> sp.     | M  | TSA | + |
| MW089156 | 190 | <i>Ochrobactrum</i> sp.     | M  | TSA | + |
| MW089157 | 191 | <i>Ochrobactrum</i> sp.     | M  | TSA | + |
| MW089158 | 192 | <i>Ochrobactrum</i> sp.     | M  | TSA | + |
| MW089159 | 195 | <i>Ochrobactrum</i> sp.     | M  | R2A | + |
| MW089160 | 196 | <i>Ochrobactrum</i> sp.     | M  | R2A | + |
| MW089161 | 197 | <i>Ochrobactrum</i> sp.     | M  | R2A | + |
| MW089162 | 199 | <i>Pseudomonas</i> sp.      | FB | TSA | + |
| MW089163 | 200 | <i>Enterobacter</i> sp.     | FB | TSA | + |
| MW089164 | 202 | <i>Enterobacter</i> sp.     | FB | TSA | + |
| MW089165 | 203 | <i>Microbacterium</i> sp.   | R  | TSA | + |
| MW089166 | 205 | <i>Microbacterium</i> sp.   | R  | TSA | + |
| MW089167 | 206 | <i>Bacillus</i> sp.         | R  | TSA | + |
| MW089168 | 207 | <i>Bacillus</i> sp.         | R  | TSA | + |
| MW089169 | 208 | <i>Bacillus</i> sp.         | R  | TSA | + |
| MW089170 | 209 | <i>Enterobacter</i> sp.     | FB | MEA | + |
| MW089171 | 210 | <i>Erwinia</i> sp.          | FB | MEA | + |
| MW089172 | 212 | <i>Enterobacter</i> sp.     | FB | MEA | + |
| MW089173 | 213 | <i>Bacillus</i> sp.         | R  | MEA | + |
| MW089174 | 215 | <i>Pseudomonas</i> sp.      | R  | MEA | + |
| MW089175 | 216 | <i>Microbacterium</i> sp.   | R  | MEA | + |
| MW089176 | 217 | <i>Sphingobacterium</i> sp. | R  | MEA | + |
| MW089177 | 219 | <i>Pseudomonas</i> sp.      | R  | MEA | + |
| MW089178 | 221 | <i>Pseudomonas</i> sp.      | R  | R2A | + |

|          |     |                            |    |     |   |
|----------|-----|----------------------------|----|-----|---|
| MW089179 | 222 | <i>Pseudomonas</i> sp.     | R  | R2A | + |
| MW089180 | 223 | <i>Microbacterium</i> sp.  | R  | R2A | + |
| MW089181 | 227 | <i>Pseudomonas</i> sp.     | R  | TSA | + |
| MW089182 | 229 | <i>Pseudomonas</i> sp.     | R  | TSA | + |
| MW089183 | 231 | <i>Pseudomonas</i> sp.     | M  | TSA | + |
| MW089184 | 233 | <i>Microbacterium</i> sp.  | M  | TSA | + |
| MW089185 | 241 | <i>Microbacterium</i> sp.  | R  | R2A | + |
| MW089186 | 242 | <i>Pseudomonas</i> sp.     | M  | R2A | + |
| MW089187 | 243 | <i>Micrococcus</i> sp.     | M  | R2A | + |
| MW089188 | 244 | <i>Pseudomonas</i> sp.     | M  | R2A | + |
| MW089189 | 246 | <i>Bacillus</i> sp.        | FB | R2A | + |
| MW089190 | 248 | <i>Klebsiella</i> sp.      | FB | R2A | + |
| MW089191 | 250 | <i>Kluyvera</i> sp.        | FB | R2A | + |
| MW089192 | 251 | <i>Kluyvera</i> sp.        | FB | R2A | + |
| MW089193 | 252 | <i>Klebsiella</i> sp.      | FB | R2A | + |
| MW089194 | 253 | <i>Bacillus</i> sp.        | FB | TSA | + |
| MW089195 | 254 | <i>Bacillus</i> sp.        | FB | TSA | + |
| MW089196 | 255 | <i>Pseudomonas</i> sp.     | FB | TSA | + |
| MW089197 | 256 | <i>Pseudomonas</i> sp.     | FB | TSA | + |
| MW089198 | 257 | <i>Pseudomonas</i> sp.     | FB | TSA | + |
| MW089199 | 258 | <i>Phyllobacterium</i> sp. | FB | TSA | + |
| MW089200 | 259 | <i>Microbacterium</i> sp.  | FB | TSA | + |
| MW089201 | 260 | <i>Bacillus</i> sp.        | FB | TSA | + |
| MW089202 | 261 | <i>Bacillus</i> sp.        | M  | TSA | + |
| MW089203 | 263 | <i>Bacillus</i> sp.        | M  | TSA | + |
| MW089204 | 264 | <i>Bacillus</i> sp.        | M  | TSA | + |
| MW089205 | 266 | <i>Bacillus</i> sp.        | M  | MEA | + |
| MW089206 | 274 | <i>Bacillus</i> sp.        | FB | R2A | + |
| MW089207 | 275 | <i>Bacillus</i> sp.        | FB | R2A | + |
| MW089208 | 276 | <i>Paenibacillus</i> sp.   | FB | R2A | + |
| MW089209 | 277 | <i>Pseudomonas</i> sp.     | FB | R2A | + |
| MW089210 | 278 | <i>Pseudomonas</i> sp.     | FB | R2A | + |
| MW089211 | 279 | <i>Bacillus</i> sp.        | M  | R2A | + |
| MW089212 | 280 | <i>Bacillus</i> sp.        | M  | R2A | + |
| MW089213 | 281 | <i>Serratia</i> sp.        | M  | R2A | + |
| MW089214 | 282 | <i>Staphylococcus</i> sp.  | FB | TSA | + |
| MW089215 | 283 | <i>Microbacterium</i> sp.  | FB | TSA | + |
| MW089216 | 284 | <i>Staphylococcus</i> sp.  | FB | TSA | + |
| MW089217 | 285 | <i>Staphylococcus</i> sp.  | FB | TSA | + |
| MW089218 | 286 | <i>Bacillus</i> sp.        | FB | TSA | + |
| MW089219 | 288 | <i>Bacillus</i> sp.        | FB | TSA | + |
| MW089220 | 289 | <i>Bacillus</i> sp.        | FB | TSA | + |
| MW089221 | 290 | <i>Bacillus</i> sp.        | FB | TSA | + |
| MW089222 | 291 | <i>Staphylococcus</i> sp.  | FB | TSA | + |
| MW089223 | 292 | <i>Staphylococcus</i> sp.  | FB | TSA | + |

|          |     |                           |    |     |   |
|----------|-----|---------------------------|----|-----|---|
| MW089224 | 293 | <i>Bacillus</i> sp.       | FB | R2A | + |
| MW089225 | 294 | <i>Staphylococcus</i> sp. | FB | R2A | + |
| MW089226 | 295 | <i>Staphylococcus</i> sp. | FB | R2A | + |
| MW089227 | 296 | <i>Microbacterium</i> sp. | FB | R2A | + |
| MW089228 | 297 | <i>Staphylococcus</i> sp. | FB | R2A | + |
| MW089229 | 298 | <i>Microbacterium</i> sp. | FB | R2A | + |
| MW089230 | 299 | <i>Staphylococcus</i> sp. | FB | MEA | + |
| MW089231 | 301 | <i>Staphylococcus</i> sp. | FB | MEA | + |
| MW089232 | 302 | <i>Staphylococcus</i> sp. | FB | MEA | + |
| MW089233 | 305 | <i>Ewingella</i> sp.      | FB | TSA | + |
| MW089234 | 306 | <i>Ewingella</i> sp.      | FB | TSA | + |
| MW089235 | 307 | <i>Ewingella</i> sp.      | FB | TSA | + |
| MW089236 | 308 | <i>Ewingella</i> sp.      | FB | TSA | + |
| MW089237 | 309 | <i>Streptomyces</i> sp.   | FB | TSA | + |
| MW089238 | 310 | <i>Streptomyces</i> sp.   | FB | TSA | + |
| MW089239 | 311 | <i>Streptomyces</i> sp.   | FB | TSA | + |
| MW089240 | 312 | <i>Ewingella</i> sp.      | FB | TSA | + |
| MW089241 | 313 | <i>Streptomyces</i> sp.   | FB | TSA | + |
| MW089242 | 314 | <i>Streptomyces</i> sp.   | FB | TSA | + |
| MW089243 | 315 | <i>Streptomyces</i> sp.   | FB | TSA | + |
| MW089244 | 316 | <i>Streptomyces</i> sp.   | FB | TSA | + |
| MW089245 | 317 | <i>Streptomyces</i> sp.   | FB | TSA | + |
| MW089246 | 318 | <i>Streptomyces</i> sp.   | FB | TSA | - |
| MW089247 | 319 | <i>Streptomyces</i> sp.   | FB | TSA | + |
| MW089248 | 320 | <i>Ewingella</i> sp.      | FB | TSA | + |
| MW089249 | 323 | <i>Leifsonia</i> sp.      | FB | TSA | + |
| MW089250 | 324 | <i>Streptomyces</i> sp.   | FB | TSA | + |
| MW089251 | 325 | <i>Ewingella</i> sp.      | FB | R2A | + |
| MW089252 | 326 | <i>Ewingella</i> sp.      | FB | R2A | + |
| MW089253 | 327 | <i>Ewingella</i> sp.      | FB | R2A | + |
| MW089254 | 328 | <i>Ewingella</i> sp.      | FB | R2A | + |
| MW089255 | 329 | <i>Ewingella</i> sp.      | FB | R2A | + |
| MW089256 | 330 | <i>Ewingella</i> sp.      | FB | R2A | + |
| MW089257 | 331 | <i>Ewingella</i> sp.      | FB | R2A | + |
| MW089258 | 332 | <i>Ewingella</i> sp.      | FB | R2A | + |
| MW089259 | 333 | <i>Ewingella</i> sp.      | FB | R2A | + |
| MW089260 | 334 | <i>Ewingella</i> sp.      | FB | R2A | + |
| MW089261 | 335 | <i>Streptomyces</i> sp.   | FB | R2A | + |
| MW089262 | 337 | <i>Moraxella</i> sp.      | FB | R2A | + |
| MW089263 | 338 | <i>Streptomyces</i> sp.   | FB | R2A | + |
| MW089264 | 339 | <i>Streptomyces</i> sp.   | FB | R2A | + |
| MW089265 | 340 | <i>Streptomyces</i> sp.   | FB | R2A | + |
| MW089266 | 341 | <i>Ewingella</i> sp.      | FB | R2A | + |
| MW089267 | 343 | <i>Burkholderia</i> sp.   | FB | R2A | + |
| MW089268 | 344 | <i>Ewingella</i> sp.      | FB | R2A | + |

|          |     |                              |    |     |   |
|----------|-----|------------------------------|----|-----|---|
| MW089269 | 345 | <i>Streptomyces</i> sp.      | FB | R2A | + |
| MW089270 | 346 | <i>Streptomyces</i> sp.      | FB | R2A | + |
| MW089271 | 347 | <i>Dermacoccus</i> sp.       | R  | MEA | + |
| MW089272 | 348 | <i>Enterobacter</i> sp.      | FB | MEA | + |
| MW089273 | 349 | <i>Enterobacter</i> sp.      | FB | MEA | + |
| MW089274 | 350 | <i>Enterobacter</i> sp.      | FB | MEA | + |
| MW089275 | 351 | <i>Klebsiella</i> sp.        | FB | MEA | + |
| MW089276 | 352 | <i>Klebsiella</i> sp.        | FB | MEA | - |
| MW089277 | 353 | <i>Staphylococcus</i> sp.    | R  | TSA | - |
| MW089278 | 355 | <i>Staphylococcus</i> sp.    | R  | TSA | + |
| MW089279 | 356 | <i>Staphylococcus</i> sp.    | R  | TSA | + |
| MW089280 | 358 | <i>Staphylococcus</i> sp.    | R  | TSA | + |
| MW089281 | 359 | <i>Staphylococcus</i> sp.    | R  | TSA | + |
| MW089282 | 360 | <i>Staphylococcus</i> sp.    | R  | TSA | + |
| MW089283 | 361 | <i>Streptomyces</i> sp.      | R  | TSA | + |
| MW089284 | 362 | <i>Staphylococcus</i> sp.    | R  | TSA | + |
| MW089285 | 363 | <i>Dermacoccus</i> sp.       | R  | TSA | + |
| MW089286 | 364 | <i>Streptomyces</i> sp.      | R  | TSA | + |
| MW089287 | 365 | <i>Staphylococcus</i> sp.    | R  | TSA | + |
| MW089288 | 367 | <i>Bacillus</i> sp.          | R  | TSA | + |
| MW089289 | 368 | <i>Staphylococcus</i> sp.    | R  | TSA | + |
| MW089290 | 369 | <i>Bacillus</i> sp.          | R  | TSA | + |
| MW089291 | 370 | <i>Staphylococcus</i> sp.    | R  | TSA | + |
| MW089292 | 371 | <i>Streptomyces</i> sp.      | R  | TSA | + |
| MW089293 | 372 | <i>Staphylococcus</i> sp.    | R  | TSA | + |
| MW089294 | 373 | <i>Staphylococcus</i> sp.    | R  | TSA | + |
| MW089295 | 374 | <i>Paenispodosarcina</i> sp. | R  | TSA | + |
| MW089296 | 377 | <i>Streptomyces</i> sp.      | R  | R2A | + |
| MW089297 | 378 | <i>Staphylococcus</i> sp.    | R  | R2A | + |
| MW089298 | 379 | <i>Streptomyces</i> sp.      | R  | R2A | + |
| MW089299 | 380 | <i>Streptomyces</i> sp.      | R  | R2A | + |
| MW089300 | 381 | <i>Staphylococcus</i> sp.    | R  | R2A | + |
| MW089301 | 382 | <i>Staphylococcus</i> sp.    | R  | R2A | + |
| MW089302 | 383 | <i>Streptomyces</i> sp.      | R  | R2A | + |
| MW089303 | 384 | <i>Staphylococcus</i> sp.    | R  | R2A | + |
| MW089304 | 385 | <i>Staphylococcus</i> sp.    | R  | R2A | + |
| MW089305 | 386 | <i>Streptomyces</i> sp.      | R  | R2A | + |



**Table S2: Estimated abundances of bacterial species derived from different tissues of *S. lacrymans*** (see Fig. 2). Abundances of bacterial species (in CFU g<sup>-1</sup>) were estimated by an inverse morphotype approach. Because of the reciprocal approach, only relative abundances are indicated. Bacterial abundances of all used isolation media were summarized.

| Genera                             | Tissue type        |                     |                    | Sum [CFU g <sup>-1</sup> ; %] |
|------------------------------------|--------------------|---------------------|--------------------|-------------------------------|
|                                    | Fruiting body      | Mycelium            | Rhizomorph         |                               |
| <i>Paenibacillus</i> sp.           | 80720              | 1008.2              | 4448.4             | <b>11064384295; 52%</b>       |
| <i>Sporosarcina</i> sp.            | 4023216            | -                   | -                  |                               |
| <i>Paenisporosarcina</i> sp.       | 1757400000         | -                   | 6081.9             |                               |
| <i>Solibacillus</i> sp.            | 361800             | -                   | -                  |                               |
| <i>Bacillus</i> sp.                | 1914474399         | 5871251379          | 71259161.5         |                               |
| <i>Pausicalibacillus</i> sp.       | -                  | 385920000           | -                  |                               |
| <i>Staphylococcus</i> sp.          | 1034950852         | 2414403.6           | 506825             |                               |
| <b>Firmicutes spp.</b>             | <b>4711290988</b>  | <b>6281316791</b>   | <b>71776516.8</b>  |                               |
| <i>Microbacterium</i> spp.         | 130853242.9        | 123524399           | 6320480            | <b>1200427620; 6%</b>         |
| <i>Agromyces</i> spp.              | 217482             | -                   | 41653200           |                               |
| <i>Oerskovia</i> spp.              | -                  | 195548222           | -                  |                               |
| <i>Cellulomonas</i> spp.           | -                  | 161.36              | -                  |                               |
| <i>Arhtrobacter</i> spp.           | -                  | 242.16              | -                  |                               |
| <i>Brevibacterium</i> spp.         | 36340637.4         | -                   | -                  |                               |
| <i>Streptomyces</i> spp.           | 331878384          | 16040000            | 111294715.4        |                               |
| <i>Rhodococcus</i> spp.            | 4422               | -                   | -                  |                               |
| <i>Nocardia</i> spp.               | -                  | 4020000             | -                  |                               |
| <i>Micrococcus</i> spp.            | n/a                | n/a                 | n/a                |                               |
| <i>Leifsonia</i> spp.              | 2032               | -                   | -                  |                               |
| <i>Dermacoccus</i> spp.            | 202730000          | -                   | -                  |                               |
| <b>Actinobacteria spp.</b>         | <b>702026200.3</b> | <b>339133024.56</b> | <b>159268395.4</b> |                               |
| <i>Flavobacterium</i> spp.         | 769216000          | 40228140            | -                  | <b>809444547.6; 4%</b>        |
| <i>Sphingobacterium</i> spp.       | -                  | 407.6               | -                  |                               |
| <i>Chryseobacterium</i> spp.       | n/a                | n/a                 | n/a                |                               |
| <i>Pseudosphingobacterium</i> spp. | n/a                | n/a                 | n/a                |                               |
| <b>Bacteroidetes spp.</b>          | <b>769216000</b>   | <b>40228547.6</b>   | <b>0</b>           |                               |
| <i>Stenotrophomonas</i> spp.       | 166283.2           | 185483.64           | 2830800            |                               |
| <i>Bordetella</i> spp.             | -                  | 80440               | 1124232000         |                               |
| <i>Alcaligenes</i> spp.            | -                  | 161.36              | 6066               |                               |
| <i>Advenella</i> spp.              | -                  | 804400              | 29925600           |                               |

|                                          |                   |                   |                   |                        |
|------------------------------------------|-------------------|-------------------|-------------------|------------------------|
| <i>Pseudomonas</i> spp.                  | 54622374          | 2183356548        | 1161025013        |                        |
| <i>Erwinia</i> spp.                      | 16800000          | 40360000          | -                 |                        |
| <i>Rahnella</i> spp.                     | 484,488           | -                 | -                 |                        |
| <i>Ewingella</i> spp.                    | 1538224           | 89672000          | -                 |                        |
| <i>Pantoea</i> spp.                      | 24120             | -                 | -                 |                        |
| <i>Raoultella</i> spp.                   | -                 | 1176,08           | -                 |                        |
| <i>Serratia</i> spp.                     | -                 | 247418581.52      | 24696             |                        |
| <i>Achromobacter</i> spp.                | -                 | 103300000         | -                 |                        |
| <i>Burkholderia</i> spp.                 | 3341984           | -                 | -                 |                        |
| <i>Enterobacter</i> spp.                 | 18043920          | -                 | -                 |                        |
| <i>Klebsiella</i> spp.                   | 7190172           | 40450000          | 303400            |                        |
| <i>Luteibacter</i> spp.                  | -                 | 82.64             | -                 |                        |
| <i>Ochrobactrum</i> spp.                 | -                 | 99851500.8        | -                 |                        |
| <i>Xanthomonas</i> spp.                  | n/a               | n/a               | n/a               |                        |
| <i>Pectobacterium</i> spp.               | 137182.4          | -                 | -                 |                        |
| <i>Kluyvera</i> spp.                     | 2688000000        | -                 | -                 |                        |
| <i>Phyllobacterium</i> spp.              | 4080000           | -                 | -                 |                        |
| <i>Moraxella</i> spp.                    | 125984            | -                 | -                 |                        |
| <b><i>Proteobacteria</i> spp.</b>        | <b>2794070728</b> | <b>2805480374</b> | <b>2318347575</b> | <b>7917898677; 38%</b> |
|                                          |                   |                   |                   |                        |
| <b>Total [CFU g<sup>-1</sup> tissue]</b> | <b>8976477932</b> | <b>9466158737</b> | <b>2549392487</b> | <b>20992029156</b>     |
| <b>[%]</b>                               | <b>42.76</b>      | <b>45.1</b>       | <b>12.144</b>     | <b>100</b>             |

6  
7

# **Table S3: Results of Pectinase, Xylanase, Cellulase and Amylase Production Assays:**

Bacteria isolated from *Serpula lacrymans* tissue (FB = Fruiting body, M = Mycelia, R = Rhizomorph); - means no production of according enzyme (i.e. no halo), ~ minimal production of enzyme (halo zone not more than 1 mm of the edges of the colonies), + enzymatic activity (halo zone smaller than 8 mm from the edges of the colonies), and ++ high enzymatic activity (halo zone larger than 8 mm). Plates were evaluated after 2 to 4 days (25 °C). \* Bacterial isolate could not be identified based on the phylogenetic analysis.

| Isolate No. | Species                     | tissue of Isolation | Enzyme produced |          |           |         |
|-------------|-----------------------------|---------------------|-----------------|----------|-----------|---------|
|             |                             |                     | Pectinase       | Xylanase | Cellulase | Amylase |
| 01          | <i>Microbacterium</i> sp.   | FB                  | ~               | +        | -         | +       |
| 02          | <i>Microbacterium</i> sp.   | FB                  | ~               | -        | -         | -       |
| 03          | <i>Staphylococcus</i> sp.   | FB                  | ~               | -        | -         | -       |
| 04          | <i>Microbacterium</i> sp.   | FB                  | ~               | -        | -         | +       |
| 05          | <i>Rahnella</i> sp.         | FB                  | -               | ~        | +         | -       |
| 06          | <i>Brevibacterium</i> sp.   | FB                  | -               | -        | -         | -       |
| 07          | <i>Brevibacterium</i> sp.   | FB                  | -               | -        | -         | -       |
| 08          | <i>Microbacterium</i> sp.   | M                   | -               | -        | -         | +       |
| 09          | <i>Staphylococcus</i> sp.   | M                   | -               | -        | -         | -       |
| 10          | <i>Staphylococcus</i> sp.   | M                   | -               | +        | +         | +       |
| 11          | <i>Stenotrophomonas</i> sp. | M                   | -               | -        | -         | -       |
| 12          | <i>Raoultella</i> sp.       | M                   | -               | -        | ~         | ~       |
| 13          | <i>Serratia</i> sp.         | M                   | +               | +        | +         | +       |
| 14          | <i>Pseudomonas</i> sp.      | M                   | +               | -        | ++        | +       |
| 15          | <i>Sphingobacterium</i> sp. | M                   | -               | -        | -         | +       |
| 16          | <i>Raoultella</i> sp.       | M                   | -               | +        | -         | +       |
| 17          | <i>Okibacterium</i> sp.     | M                   | -               | -        | -         | +       |
| 18          | <i>Ewingella</i> sp.        | M                   | +               | -        | -         | +       |
| 19          | <i>Paenibacillus</i> sp.    | FB                  | -               | -        | -         | +       |
| 20          | <i>Microbacterium</i> sp.   | FB                  | -               | +        | -         | +       |
| 21          | <i>Pseudomonas</i> sp.      | FB                  | -               | -        | -         | +       |
| 22          | <i>Microbacterium</i> sp.   | FB                  | +               | -        | -         | +       |
| 23          | <i>Microbacterium</i> sp.   | FB                  | -               | +        | -         | -       |
| 24          | <i>Microbacterium</i> sp.   | FB                  | -               | -        | ~         | -       |
| 25          | <i>Psychrobacillus</i> sp.  | M                   | -               | +        | -         | +       |
| 26          | <i>Paenibacillus</i> sp.    | M                   | +               | -        | -         | +       |
| 27          | <i>Bacillus</i> sp.         | M                   | +               | -        | -         | +       |
| 28          | <i>Advenella</i> sp.        | M                   | -               | -        | -         | -       |
| 29          | <i>Pseudomonas</i> sp.      | M                   | -               | -        | -         | +       |
| 30          | <i>Bacillus</i> sp.         | M                   | +               | -        | -         | +       |

|    |                                 |    |   |   |   |   |
|----|---------------------------------|----|---|---|---|---|
| 31 | <i>Staphylococcus</i> sp.       | M  | - | - | - | - |
| 32 | <i>Serratia</i> sp.             | M  | - | + | - | - |
| 33 | <i>Sporosarcina</i> sp.         | M  | - | - | - | - |
| 34 | <i>Bacillus</i> sp.             | M  | - | + | + | + |
| 35 | <i>Stenotrophomonas</i> sp.     | FB | - | - | - | - |
| 36 | <i>Paenibacillus</i> sp.        | FB | + | + | + | + |
| 37 | <i>Microbacterium</i> sp.       | FB | - | - | - | - |
| 38 | <i>Stenotrophomonas</i> sp.     | FB | - | - | - | - |
| 39 | <i>Pseudomonas</i> sp.          | FB | ~ | - | + | - |
| 40 | <i>Staphylococcus</i> sp.       | FB | - | - | - | - |
| 41 | <i>Flavobacterium</i> sp.       | FB | + | + | + | + |
| 42 | <i>Pseudomonas</i> sp.          | FB | - | - | - | + |
| 43 | <i>Microbacterium</i> sp.       | FB | + | + | - | + |
| 44 | <i>Paenisporosarcina</i> sp.    | FB | ~ | - | - | - |
| 45 | <i>Microbacterium</i> sp.       | FB | - | - | + | - |
| 46 | <i>Flavobacterium</i> sp.       | FB | + | + | + | + |
| 47 | <i>Bacillus</i> sp.             | R  | ~ | - | + | - |
| 48 | <i>Paenibacillus</i> sp.        | R  | + | - | - | + |
| 49 | <i>Advenella</i> sp.            | R  | - | ~ | + | + |
| 50 | <i>Bordetella</i> sp.           | R  | - | - | - | + |
| 51 | <i>Pseudomonas</i> sp.          | R  | - | + | ~ | + |
| 52 | <i>Alcaligenaceae</i> bacterium | R  | - | - | - | - |
| 53 | <i>Stenotrophomonas</i> sp.     | M  | - | + | + | + |
| 54 | <i>Bacillus</i> sp.             | M  | - | - | ~ | - |
| 55 | <i>Pseudomonas</i> sp.          | M  | - | + | + | + |
| 56 | <i>Oerskovia</i> sp.            | M  | - | - | - | - |
| 57 | <i>Advenella</i> sp.            | M  | + | - | - | + |
| 58 | <i>Bordetella</i> sp.           | M  | - | - | + | - |
| 59 | <i>Brevibacterium</i> sp.       | M  | - | + | - | + |
| 60 | <i>Microbacterium</i> sp.       | M  | - | - | + | + |
| 61 | <i>Stenotrophomonas</i> sp.     | M  | - | - | - | ~ |
| 62 | <i>Raoultella</i> sp.           | M  | - | + | - | + |
| 63 | <i>Paenibacillus</i> sp.        | M  | + | - | - | + |
| 64 | <i>Cellulomonas</i> sp.         | M  | - | + | - | + |
| 65 | <i>Alcaligenaceae</i> sp.       | M  | - | + | - | + |
| 66 | <i>Stenotrophomonas</i> sp.     | M  | - | + | - | + |
| 67 | <i>Staphylococcus</i> sp.       | M  | - | + | + | - |
| 68 | <i>Staphylococcus</i> sp.       | M  | ~ | - | ~ | + |
| 69 | <i>Arthrobacter</i> sp.         | M  | + | + | + | + |
| 70 | <i>Brevibacterium</i> sp.       | M  | - | + | - |   |
| 71 | <i>Bacillus</i> sp.             | FB | + | ~ | + | + |
| 72 | <i>Sporosarcina</i> sp.         | FB | - | - | - | - |
| 73 | <i>Pseudomonas</i> sp.          | FB | - | - | ~ | + |
| 74 | <i>Pantoea</i> sp.              | FB | + | - | + | - |
| 75 | <i>Rhodococcus</i> sp.          | FB | - | ~ | ~ | ~ |

|     |                              |    |   |   |   |    |
|-----|------------------------------|----|---|---|---|----|
| 76a | <i>Sporosarcina</i> sp.      | FB | - | - | - | ~  |
| 77  | <i>Serratia</i> sp.          | M  | + | + | - | +  |
| 78a | <i>Microbacterium</i> sp.    | M  | - | - | - | +  |
| 78b | <i>Pseudomonas</i> sp.       | M  | + | + | - | +  |
| 79  | <i>Paenibacillus</i> sp.     | M  | + | + | + | +  |
| 80  | <i>Oerskovia</i> sp.         | M  | + | + | - | +  |
| 81  | <i>Erwinia</i> sp.           | M  | - | + | + | +  |
| 82  | <i>Agromyces</i> sp.         | R  | - | + | - | +  |
| 83  | <i>Bacillus</i> sp.          | R  | - | + | - | +  |
| 84  | <i>Bacillus</i> sp.          | R  | - | - | - | ++ |
| 85  | <i>Bacillus</i> sp.          | R  | - | + | - | +  |
| 86  | <i>Bacillus</i> sp.          | R  | - | - | + | +  |
| 87  | <i>Bacillus</i> sp.          | R  | ~ | + | - | +  |
| 88  | <i>Agromyces</i> sp.         | FB | - | - | - | +  |
| 89  | <i>Agromyces</i> sp.         | FB | - | - | - | +  |
| 90  | <i>Bacillus</i> sp.          | FB | + | + | - | +  |
| 91  | <i>Pseudomonas</i> sp.       | FB | + | + | + | +  |
| 92  | <i>Bacillus</i> sp.          | FB | + | + | - | +  |
| 93  | <i>Streptomyces</i> sp.      | FB | - | + | - | +  |
| 94  | *                            | FB | - | + | - | +  |
| 95  | <i>Microbacterium</i> sp.    | M  | - | - | - | +  |
| 96  | <i>Oerskovia</i> sp.         | M  | - | + | - | +  |
| 98  | <i>Bacillus</i> sp.          | M  | + | + | - | +  |
| 99  | <i>Microbacterium</i> sp.    | M  | - | - | - | +  |
| 101 | <i>Agromyces</i> sp.         | R  | - | - | - | +  |
| 102 | <i>Bacillus</i> sp.          | R  | + | + | - | ++ |
| 104 | <i>Bacillus</i> sp.          | R  | - | + | + | ++ |
| 105 | <i>Chryseobacterium</i> sp.  | R  | + | + | - | +  |
| 106 | <i>Oerskovia</i> sp.         | R  | + | - | - | +  |
| 107 | <i>Bacillus</i> sp.          | FB | + | + | - | +  |
| 108 | <i>Bacillus</i> sp.          | FB | - | + | + | ++ |
| 109 | <i>Caballeronia</i> sp.      | FB | - | + | - | +  |
| 111 | <i>Streptomyces</i> sp.      | FB | ~ | + | - | +  |
| 113 | <i>Pichia/Saccharomyces</i>  | FB | - | + | - | +  |
| 114 | <i>Solibacillus</i> sp.      | FB | - | + | - | -  |
| 115 | <i>Lysobacter</i> sp.        | FB | - | - | - | +  |
| 116 | <i>Paraburkholderia</i> sp.  | FB | - | + | - | +  |
| 117 | <i>Bacillus</i> sp.          | M  | - | - | - | +  |
| 118 | <i>Flavobacterium</i> sp.    | M  | - | - | - | ++ |
| 119 | <i>Flavobacterium</i> sp.    | M  | - | - | - | +  |
| 120 | <i>Bacillus</i> sp.          | M  | - | + | - | -  |
| 121 | *                            | M  | - | - | - | -  |
| 124 | <i>Paucisalibacillus</i> sp. | M  | - | + | - | ~  |
| 125 | <i>Microbacterium</i> sp.    | M  | - | + | + | +  |
| 126 | <i>Microbacterium</i> sp.    | M  | - | - | - | ~  |

|     |                                   |    |    |   |    |    |
|-----|-----------------------------------|----|----|---|----|----|
| 127 | <i>Nocardia</i> sp.               | M  | -  | - | ~  | ++ |
| 129 | <i>Pseudomonas</i> sp.            | M  | -  | - | +  | +  |
| 134 | <i>Enterobacter</i> sp.           | M  | +  | - | -  | +  |
| 135 | <i>Pseudosphingobacterium</i> sp. | M  | -  | - | ++ | ++ |
| 136 | *                                 | M  | -  | - | -  | +  |
| 138 | <i>Streptomyces</i> sp.           | M  | -  | + | -  | ++ |
| 142 | <i>Enterobacter</i> sp.           | M  | -  | - | -  | ~  |
| 143 | <i>Pseudomonas</i> sp.            | M  | +  | - | -  | +  |
| 144 | <i>Pseudomonas</i> sp.            | M  | -  | - | -  | +  |
| 145 | <i>Bacillus</i> sp.               | M  | ++ | - | -  | +  |
| 146 | <i>Achromobacter</i> sp.          | M  | -  | - | -  | -  |
| 147 | *                                 | M  | -  | - | -  | +  |
| 148 | <i>Bacillus</i> sp.               | M  | -  | + | -  | +  |
| 149 | <i>Stenotrophomonas</i> sp.       | M  | -  | - | -  | +  |
| 150 | <i>Pseudomonas</i> sp.            | M  | -  | - | -  | -  |
| 151 | <i>Bacillus</i> sp.               | M  | -  | - | -  | +  |
| 152 | <i>Pseudomonas</i> sp.            | M  | +  | - | -  | +  |
| 153 | <i>Luteibacter</i> sp.            | M  | -  | - | -  | +  |
| 154 | <i>Candida</i> sp.                | M  | +  | + | +  | +  |
| 155 | <i>Pseudomonas</i> sp.            | M  | ++ | - | -  | +  |
| 157 | <i>Bacillus</i> sp.               | M  | ++ | - | -  | +  |
| 158 | <i>Bacillus</i> sp.               | M  | -  | + | -  | +  |
| 160 | <i>Arthrobacter</i> sp.           | FB | -  | - | -  | +  |
| 161 | <i>Streptomyces</i> sp.           | FB | -  | + | -  | ++ |
| 162 | <i>Stenotrophomonas</i> sp.       | FB | -  | - | -  | ~  |
| 163 | <i>Advenella</i> sp.              | FB | -  | - | +  | -  |
| 164 | <i>Microbacterium</i> sp.         | FB | -  | + | -  | +  |
| 165 | <i>Brevibacterium</i> sp.         | FB | -  | - | -  | +  |
| 170 | <i>Klebsiella</i> sp.             | R  | -  | - | -  | ~  |
| 171 | <i>Microbacterium</i> sp.         | R  | -  | - | -  | +  |
| 172 | <i>Microbacterium</i> sp.         | R  | -  | - | -  | -  |
| 173 | <i>Microbacterium</i> sp.         | R  | -  | + | -  | -  |
| 174 | <i>Streptomyces</i> sp.           | R  | +  | + | -  | +  |
| 180 | <i>Microbacterium</i> sp.         | R  | -  | + | -  | -  |
| 181 | <i>Williamsia</i> sp.             | R  | -  | - | -  | +  |
| 182 | <i>Microbacterium</i> sp.         | R  | -  | - | -  | +  |
| 183 | <i>Williamsia</i> sp.             | R  | -  | - | -  | ~  |
| 184 | <i>Microbacterium</i> sp.         | R  | -  | - | -  | +  |
| 186 | *                                 | M  | -  | - | -  | -  |
| 187 | <i>Streptomyces</i> sp.           | M  | -  | - | -  | -  |
| 188 | <i>Microbacterium</i> sp.         | M  | -  | + | -  | -  |
| 189 | <i>Ochrobactrum</i> sp.           | M  | -  | - | -  | +  |
| 190 | <i>Ochrobactrum</i> sp.           | M  | -  | - | -  | +  |
| 191 | <i>Ochrobactrum</i> sp.           | M  | -  | - | -  | +  |



|     |                             |    |   |   |   |    |
|-----|-----------------------------|----|---|---|---|----|
| 192 | <i>Ochrobactrum</i> sp.     | M  | - | - | - | +  |
| 195 | <i>Ochrobactrum</i> sp.     | M  | - | - | - | +  |
| 196 | <i>Ochrobactrum</i> sp.     | M  | - | - | - | +  |
| 197 | <i>Ochrobactrum</i> sp.     | M  | - | - | - | ++ |
| 198 | *                           | FB | - | + | + | -  |
| 199 | <i>Pseudomonas</i> sp.      | FB | - | - | + | +  |
| 200 | <i>Enterobacter</i> sp.     | FB | - | - | - | +  |
| 201 | <i>Bacillus</i> sp.         | FB | - | + | + | +  |
| 202 | <i>Enterobacter</i> sp.     | FB | - | + | - | +  |
| 203 | <i>Microbacterium</i> sp.   | R  | - | - | - | +  |
| 204 | *                           | R  | + | * | - | +  |
| 205 | <i>Microbacterium</i> sp.   | R  | - | - | - | ++ |
| 206 | <i>Bacillus</i> sp.         | R  | - | + | - | +  |
| 207 | <i>Bacillus</i> sp.         | R  | - | + | - | +  |
| 208 | <i>Bacillus</i> sp.         | R  | - | - | - | +  |
| 209 | <i>Enterobacter</i> sp.     | FB | - | - | - | +  |
| 210 | <i>Erwinia</i> sp.          | FB | - | + | ~ | +  |
| 211 | *                           | FB | + | - | - | +  |
| 212 | <i>Enterobacter</i> sp.     | FB | - | + | - | +  |
| 213 | <i>Bacillus</i> sp.         | R  | - | + | ~ | +  |
| 215 | <i>Pseudomonas</i> sp.      | R  | - | - | + | +  |
| 216 | <i>Microbacterium</i> sp.   | R  | - | - | - | +  |
| 217 | <i>Sphingobacterium</i> sp. | R  | - | - | - | +  |
| 218 | <i>Stenotrophomonas</i> sp. | R  | ~ | - | - | ~  |
| 219 | <i>Pseudomonas</i> sp.      | R  | + | - | - | +  |
| 220 | *                           | R  | - | + | - | ~  |
| 221 | <i>Pseudomonas</i> sp.      | R  | + | + | + | +  |
| 222 | <i>Pseudomonas</i> sp.      | R  | + | - | - | +  |
| 223 | <i>Microbacterium</i> sp.   | R  | - | + | - | +  |
| 224 | *                           | FB | - | + | - | +  |
| 225 | *                           | FB | - | - | + | +  |
| 226 | *                           | FB | - | + | - | +  |
| 227 | <i>Pseudomonas</i> sp.      | R  | + | - | - | +  |
| 228 | *                           | R  | + | + | - | +  |
| 229 | <i>Pseudomonas</i> sp.      | R  | + | - | + | +  |
| 230 | *                           | M  | - | + | - | +  |
| 231 | <i>Pseudomonas</i> sp.      | M  | + | - | - | +  |
| 232 | *                           | M  | - | + | - | +  |
| 233 | <i>Microbacterium</i> sp.   | M  | - | - | - | +  |
| 234 | *                           | FB | - | + | - | +  |
| 235 | <i>Pectobacterium</i> sp.   | FB | - | + | - | +  |
| 236 | *                           | R  | - | + | - | +  |
| 238 | *                           | R  | + | + | - | +  |
| 239 | *                           | M  | + | - | - | +  |
| 240 | <i>Serratia</i> sp.         | R  | + | - | - | +  |

|     |                            |    |    |    |    |    |
|-----|----------------------------|----|----|----|----|----|
| 241 | <i>Microbacterium</i> sp.  | R  | -  | ~  | -  | +  |
| 242 | <i>Pseudomonas</i> sp.     | M  | +  | -  | +  | +  |
| 243 | <i>Micrococcus</i> sp.     | M  | -  | +  | -  | -  |
| 244 | <i>Pseudomonas</i> sp.     | M  | +  | -  | +  | +  |
| 245 | *                          | FB | +  | -  | -  | +  |
| 246 | <i>Bacillus</i> sp.        | FB | +  | +  | -  | +  |
| 247 | *                          | FB | -  | +  | +  | -  |
| 248 | <i>Klebsiella</i> sp.      | FB | -  | -  | -  | +  |
| 249 | *                          | FB | +  | -  | -  | +  |
| 250 | <i>Kluyvera</i> sp.        | FB | +  | -  | -  | +  |
| 251 | <i>Kluyvera</i> sp.        | FB | +  | *  | -  | +  |
| 252 | <i>Klebsiella</i> sp.      | FB | -  | -  | -  | +  |
| 253 | <i>Bacillus</i> sp.        | FB | +  | -  | -  | ++ |
| 254 | <i>Bacillus</i> sp.        | FB | ++ | +  | -  | +  |
| 255 | <i>Pseudomonas</i> sp.     | FB | -  | -  | +  | +  |
| 256 | <i>Pseudomonas</i> sp.     | FB | -  | -  | -  | -  |
| 257 | <i>Pseudomonas</i> sp.     | FB | -  | +  | -  | +  |
| 258 | <i>Phyllobacterium</i> sp. | FB | -  | -  | -  | +  |
| 259 | <i>Microbacterium</i> sp.  | FB | -  | -  | -  | -  |
| 260 | <i>Bacillus</i> sp.        | FB | +  | -  | +  | -  |
| 261 | <i>Bacillus</i> sp.        | M  | -  | ++ | -  | -  |
| 262 | <i>Klebsiella</i> sp.      | M  | -  | -  | -  | +  |
| 263 | <i>Bacillus</i> sp.        | M  | -  | +  | +  | +  |
| 264 | <i>Bacillus</i> sp.        | M  | -  | +  | +  | +  |
| 265 | <i>Serratia</i> sp.        | M  | +  | +  | -  | -  |
| 266 | <i>Bacillus</i> sp.        | FB | +  | -  | -  | +  |
| 268 | *                          | M  | ~  | -  | -  | -  |
| 269 | *                          | M  | -  | -  | -  | -  |
| 274 | <i>Bacillus</i> sp.        | FB | ++ | -  | +  | +  |
| 275 | <i>Bacillus</i> sp.        | FB | ~  | +  | +  | ++ |
| 276 | <i>Paenibacillus</i> sp.   | FB | -  | -  | -  | +  |
| 277 | <i>Pseudomonas</i> sp.     | FB | -  | +  | -  | +  |
| 278 | <i>Pseudomonas</i> sp.     | FB | -  | -  | -  | +  |
| 279 | <i>Bacillus</i> sp.        | M  | ++ | +  | +  | +  |
| 280 | <i>Bacillus</i> sp.        | M  | -  | -  | ++ | ++ |
| 281 | <i>Serratia</i> sp.        | M  | -  | -  | -  | +  |
| 282 | <i>Staphylococcus</i> sp.  | FB | -  | -  | -  | +  |
| 283 | <i>Microbacterium</i> sp.  | FB | -  | +  | -  | -  |
| 284 | <i>Staphylococcus</i> sp.  | FB | -  | +  | -  | -  |
| 285 | <i>Staphylococcus</i> sp.  | FB | -  | +  | -  | -  |
| 286 | <i>Bacillus</i> sp.        | FB | +  | +  | -  | ++ |
| 287 | <i>Bacillus</i> sp.        | FB | -  | +  | ~  | +  |
| 288 | <i>Bacillus</i> sp.        | FB | -  | -  | -  | -  |
| 289 | <i>Bacillus</i> sp.        | FB | -  | +  | -  | +  |
| 290 | <i>Bacillus</i> sp.        | FB | -  | -  | -  | +  |

|     |                           |    |   |    |   |    |
|-----|---------------------------|----|---|----|---|----|
| 291 | <i>Staphylococcus</i> sp. | FB | - | -  | - | -  |
| 292 | <i>Staphylococcus</i> sp. | FB | - | -  | + | +  |
| 293 | <i>Bacillus</i> sp.       | FB | - | ++ | + | +  |
| 294 | <i>Staphylococcus</i> sp. | FB | - | -  | + | +  |
| 295 | <i>Staphylococcus</i> sp. | FB | - | -  | - | +  |
| 296 | <i>Microbacterium</i> sp. | FB | - | -  | - | ++ |
| 297 | <i>Staphylococcus</i> sp. | FB | - | +  | - | -  |
| 298 | <i>Microbacterium</i> sp. | FB | - | ++ | - | -  |
| 299 | <i>Staphylococcus</i> sp. | FB | - | ++ | + | -  |
| 301 | <i>Staphylococcus</i> sp. | FB | - | +  | - | +  |
| 302 | <i>Staphylococcus</i> sp. | FB | - | ++ | + | -  |
| 305 | <i>Ewingella</i> sp.      | FB | ~ | -  | + | +  |
| 306 | <i>Ewingella</i> sp.      | FB | + | ~  | - | +  |
| 307 | <i>Ewingella</i> sp.      | FB | + | -  | - | +  |
| 308 | <i>Ewingella</i> sp.      | FB | + | -  | - | +  |
| 309 | <i>Streptomyces</i> sp.   | FB | - | +  | ~ | -  |
| 310 | <i>Streptomyces</i> sp.   | FB | - | +  | - | -  |
| 311 | <i>Streptomyces</i> sp.   | FB | - | +  | + | -  |
| 312 | <i>Ewingella</i> sp.      | FB | + | -  | - | +  |
| 313 | <i>Streptomyces</i> sp.   | FB | - | +  | - | -  |
| 314 | <i>Streptomyces</i> sp.   | FB | ~ | +  | - | -  |
| 315 | <i>Streptomyces</i> sp.   | FB | - | -  | - | -  |
| 316 | <i>Streptomyces</i> sp.   | FB | - | +  | - | +  |
| 317 | <i>Streptomyces</i> sp.   | FB | + | +  | - | +  |
| 318 | <i>Streptomyces</i> sp.   | FB | - | +  | - | -  |
| 319 | <i>Streptomyces</i> sp.   | FB | - | +  | - | -  |
| 320 | <i>Ewingella</i> sp.      | FB | + | -  | - | ++ |
| 321 | *                         | FB | - | +  | - | ++ |
| 322 | *                         | FB | - | -  | - | -  |
| 323 | <i>Leifsonia</i> sp.      | FB | - | -  | - | -  |
| 324 | <i>Streptomyces</i> sp.   | FB | - | +  | - | ++ |
| 325 | <i>Ewingella</i> sp.      | FB | + | -  | - | ~  |
| 326 | <i>Ewingella</i> sp.      | FB | + | -  | - | ~  |
| 327 | <i>Ewingella</i> sp.      | FB | + | -  | - | +  |
| 328 | <i>Ewingella</i> sp.      | FB | + | -  | - | +  |
| 329 | <i>Ewingella</i> sp.      | FB | + | -  | - | +  |
| 330 | <i>Ewingella</i> sp.      | FB | + | -  | - | +  |
| 331 | <i>Ewingella</i> sp.      | FB | + | +  | - | +  |
| 332 | <i>Ewingella</i> sp.      | FB | ~ | +  | - | +  |
| 333 | <i>Ewingella</i> sp.      | FB | + | -  | - | +  |
| 334 | <i>Ewingella</i> sp.      | FB | + | -  | - | +  |
| 335 | <i>Streptomyces</i> sp.   | FB | - | +  | - | -  |
| 337 | <i>Moraxella</i> sp.      | FB | ~ | +  | - | -  |
| 338 | <i>Streptomyces</i> sp.   | FB | - | +  | - | -  |
| 339 | <i>Streptomyces</i> sp.   | FB | - | +  | - | -  |

|        |                              |    |   |    |   |    |
|--------|------------------------------|----|---|----|---|----|
| 340    | <i>Streptomyces</i> sp.      | FB | - | +  | - | -  |
| 341    | <i>Ewingella</i> sp.         | FB | + | -  | - | ~  |
| 343    | <i>Burkholderia</i> sp.      | FB | + | -  | - | -  |
| 344    | <i>Ewingella</i> sp.         | FB | + | -  | - | +  |
| 345    | <i>Streptomyces</i> sp.      | FB | - | +  | - | -  |
| 346    | <i>Streptomyces</i> sp.      | FB | - | +  | - | -  |
| 347    | <i>Dermaococcus</i> sp.      | R  | - | -  | - | +  |
| 348    | <i>Enterobacter</i> sp.      | FB | - | ++ | - | -  |
| 349    | <i>Enterobacter</i> sp.      | FB | - | -  | - | +  |
| 350    | <i>Enterobacter</i> sp.      | FB | - | -  | - | +  |
| 351    | <i>Klebsiella</i> sp.        | FB | - | -  | - | +  |
| 352    | <i>Klebsiella</i> sp.        | FB | - | -  | - | +  |
| 353    | <i>Staphylococcus</i> sp.    | R  | - | +  | - | -  |
| 355    | <i>Staphylococcus</i> sp.    | R  | - | ~  | - | -  |
| 356    | <i>Staphylococcus</i> sp.    | R  | - | +  | - | -  |
| 357    | *                            | R  | - | +  | - | +  |
| 358    | <i>Staphylococcus</i> sp.    | R  | + | +  | - | -  |
| 359    | <i>Staphylococcus</i> sp.    | R  | + | +  | - | ~  |
| 360    | <i>Staphylococcus</i> sp.    | R  | - | ~  | - | -  |
| 361    | <i>Streptomyces</i> sp.      | R  | - | ++ | - | +  |
| 362    | <i>Staphylococcus</i> sp.    | R  | - | ~  | - | -  |
| 363    | <i>Dermaococcus</i> sp.      | R  | - | +  | - | +  |
| 364    | <i>Streptomyces</i> sp.      | R  | - | +  | - | +  |
| 365    | <i>Staphylococcus</i> sp.    | R  | - | ~  | - | -  |
| 366 a) | *                            | R  | - | -  | - | +  |
| 366 b) | *                            | R  | + | +  | + | +  |
| 367    | <i>Bacillus</i> sp.          | R  | - | +  | + | +  |
| 368    | <i>Staphylococcus</i> sp.    | R  | - | ~  | - | -  |
| 369    | <i>Bacillus</i> sp.          | R  | - | -  | - | +  |
| 370    | <i>Staphylococcus</i> sp.    | R  | - | ~  | - | -  |
| 371    | <i>Streptomyces</i> sp.      | R  | - | +  | - | +  |
| 372    | <i>Staphylococcus</i> sp.    | R  | - | +  | - | -  |
| 373    | <i>Staphylococcus</i> sp.    | R  | - | +  | - | -  |
| 374    | <i>Paenisporosarcina</i> sp. | R  | - | +  | - | -  |
| 375    | <i>Dermaococcus</i> sp.      | R  | - | +  | - | ++ |
| 376    | *                            | R  | - | +  | - | -  |
| 377    | <i>Streptomyces</i> sp.      | R  | - | +  | - | +  |
| 378    | <i>Staphylococcus</i> sp.    | R  | - | -  | - | -  |
| 379    | <i>Streptomyces</i> sp.      | R  | - | -  | - | +  |
| 380    | <i>Streptomyces</i> sp.      | R  | - | +  | - | -  |
| 381    | <i>Staphylococcus</i> sp.    | R  | - | ~  | - | +  |
| 382    | <i>Staphylococcus</i> sp.    | R  | - | +  | - | -  |
| 383    | <i>Streptomyces</i> sp.      | R  | - | +  | - | -  |
| 384    | <i>Staphylococcus</i> sp.    | R  | - | ~  | - | ~  |
| 385    | <i>Staphylococcus</i> sp.    | R  | - | ~  | - | ~  |

15

|     |                         |   |   |   |   |   |
|-----|-------------------------|---|---|---|---|---|
| 386 | <i>Streptomyces</i> sp. | R | - | + | - | - |
|-----|-------------------------|---|---|---|---|---|
